# Supplementary material
Source: PubMed Central journal article supplement (PMC6645594)
Supplement: ao8b01271_si_002.pdf [file ao8b01271_si_002.pdf]

**The New Hybrid Type Squaramide Fused Amino Alcohol  
Organocatalyst For Enantioselective Domino Michael  
Addition/Cyclization Reaction of Oxoindolines with Cyclic 1,3-  
Diketones**

Madhu Chennapuram,<sup>†</sup> Isiaka Alade Owolabi,<sup>†</sup> Chigusa Seki,<sup>†</sup> Yuko Okuyama,<sup>‡</sup> Eunsang Kwon,<sup>§</sup> Koji Uwai,<sup>†</sup> Michio Tokiwa,<sup>||</sup> Mitsuhiro Takeshita<sup>||</sup> and Hiroto Nakano<sup>\*†</sup>

<sup>†</sup>Division of Sustainable and Environmental Engineering, Graduate School of Engineering, Muroran Institute of Technology, 27-1 Mizumoto-cho, Muroran 050-8585, Japan, Email: [catanaka@mmm.muroran-it.ac.jp](mailto:catanaka@mmm.muroran-it.ac.jp), <http://www3.muroranit.ac.jp/hnakano/>

<sup>‡</sup>Tohoku Medical and Pharmaceutical University, 4-4-1 Komatsushima, Aoba-ku, Sendai 981-8558, Japan

<sup>§</sup>Research and Analytical Centre for Giant Molecules, Graduate School of Sciences, Tohoku University, 6-3 Aoba, Aramaki, Aoba-ku, Sendai 980-8578, Japan, email: [ekwon@mtohoku.ac.jp](mailto:ekwon@mtohoku.ac.jp), [www.kiki.chem.tohoku.ac.jp/kwon/index.html](http://www.kiki.chem.tohoku.ac.jp/kwon/index.html)

<sup>||</sup>Tokiwakai Group, 62 Numajiri, Tsuduri-chou Uchigo, Iwaki 973-8053, Japan.

*Supporting Information*

Contents

|                                                                |         |
|----------------------------------------------------------------|---------|
| 1. HPLC Chromatograms                                          | S2-S18  |
| 2. Copies of <sup>1</sup> HNMR and <sup>13</sup> CNMR spectras | S20-S36 |
| 3. X-ray Crystallographic Analysis of <b>4e</b>                | S37-S40 |

## 2. HPLC Chromatographs of **4b-r**

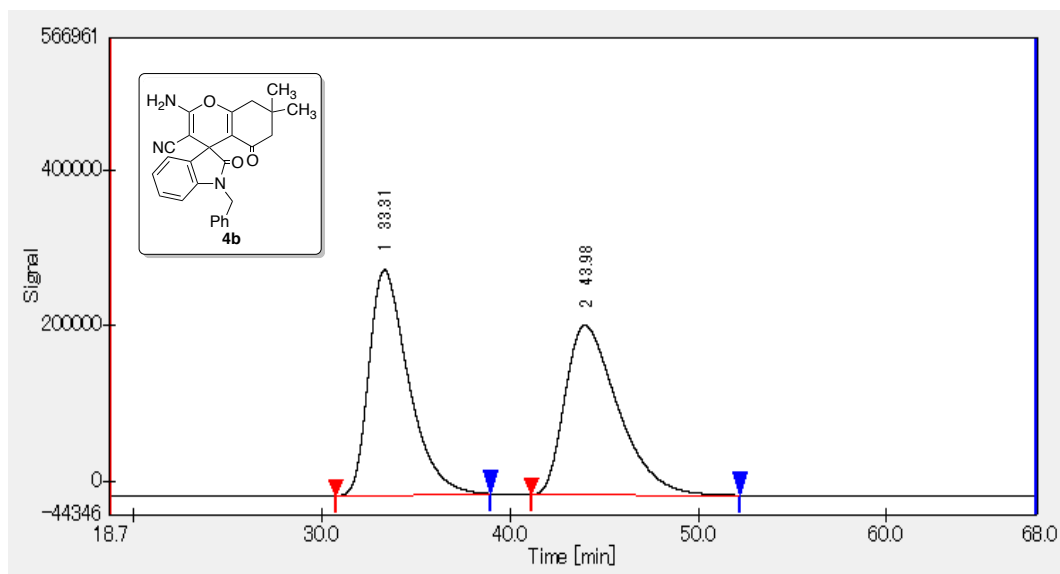

| No | Rt(min) | Area     | Area (%) | Height | NTP    | Symmetry | Resolution |
|----|---------|----------|----------|--------|--------|----------|------------|
| 1  | 33.31   | 42250203 | 49.7544  | 288571 | 1099.8 | 1.526    | 2.281      |
| 2  | 43.98   | 42667375 | 50.2456  | 217292 | 1084   | 1.563    | *****      |
|    |         | 84917578 | 100      | 505863 |        |          |            |

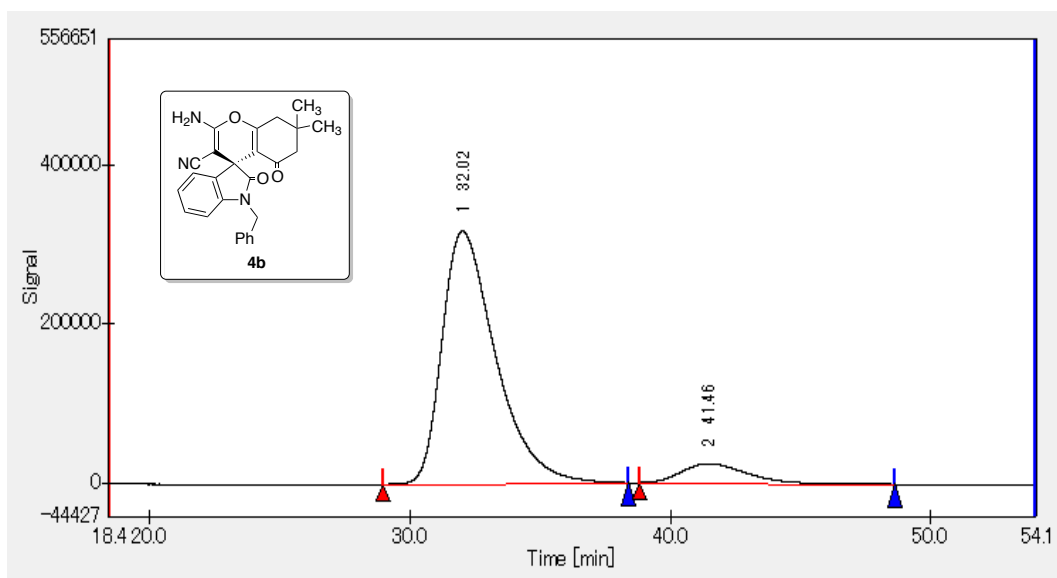

| No | Rt(min) | Area     | Area (%) | Height | NTP    | Symmetry | Resolution |
|----|---------|----------|----------|--------|--------|----------|------------|
| 1  | 32.02   | 45536322 | 91.5667  | 317882 | 1069.3 | 1.559    | 2.209      |
| 2  | 41.46   | 4193893  | 8.4333   | 24442  | 1280.5 | 1.323    | *****      |
|    |         | 49730214 | 100      | 342324 |        |          |            |

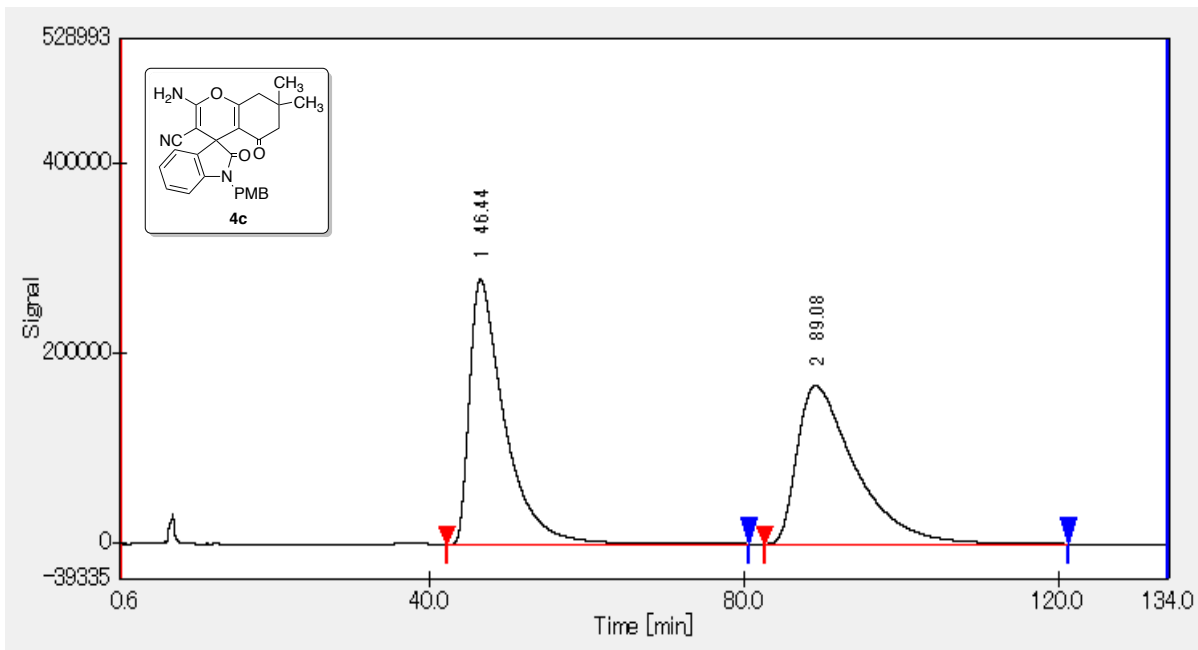

| No | Rt(min) | Area     | Area (%) | Height | NTP   | Symmetry | Resolution |
|----|---------|----------|----------|--------|-------|----------|------------|
| 1  | 46.44   | 86017132 | 50.0195  | 277991 | 459.9 | 2.167    | 3.686      |
| 2  | 89.08   | 85949967 | 49.9805  | 166146 | 606   | 2.048    | *****      |
|    |         | 1.72E+08 | 100      | 444137 |       |          |            |

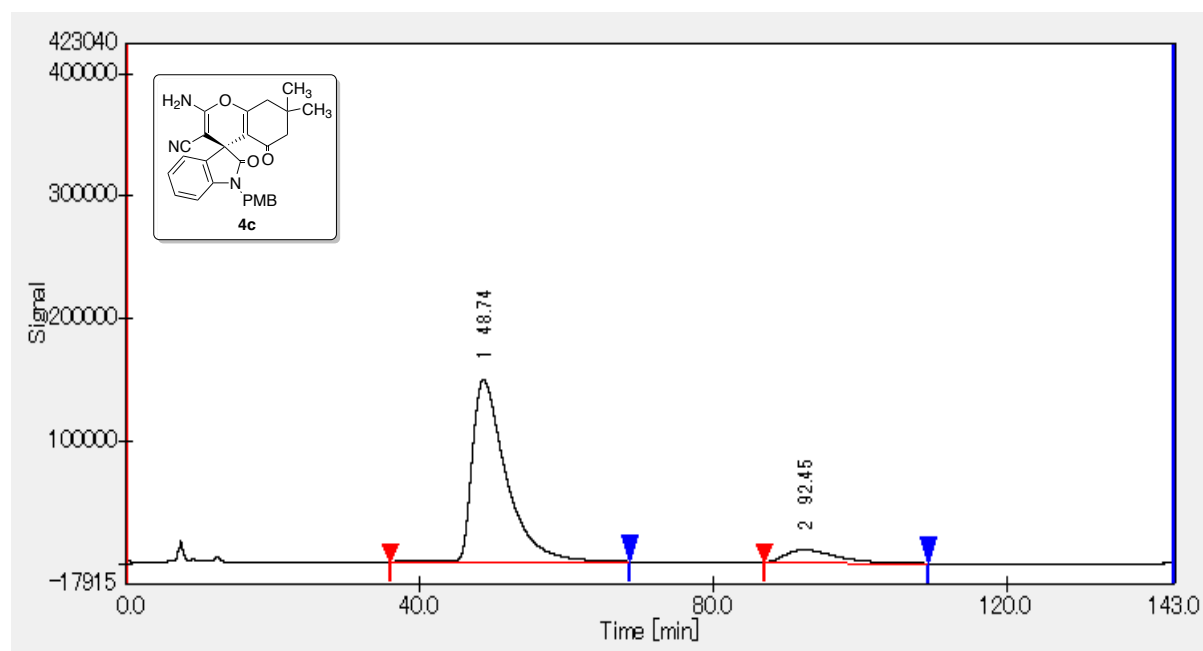

| No | Rt(min) | Area     | Area (%) | Height | NTP   | Symmetry | Resolution |
|----|---------|----------|----------|--------|-------|----------|------------|
| 1  | 48.74   | 47943928 | 90.7739  | 148675 | 485.8 | 2.028    | 4.03       |
| 2  | 92.45   | 4872937  | 9.2261   | 10327  | 829.1 | 1.608    | *****      |
|    |         | 52816865 | 100      | 159002 |       |          |            |

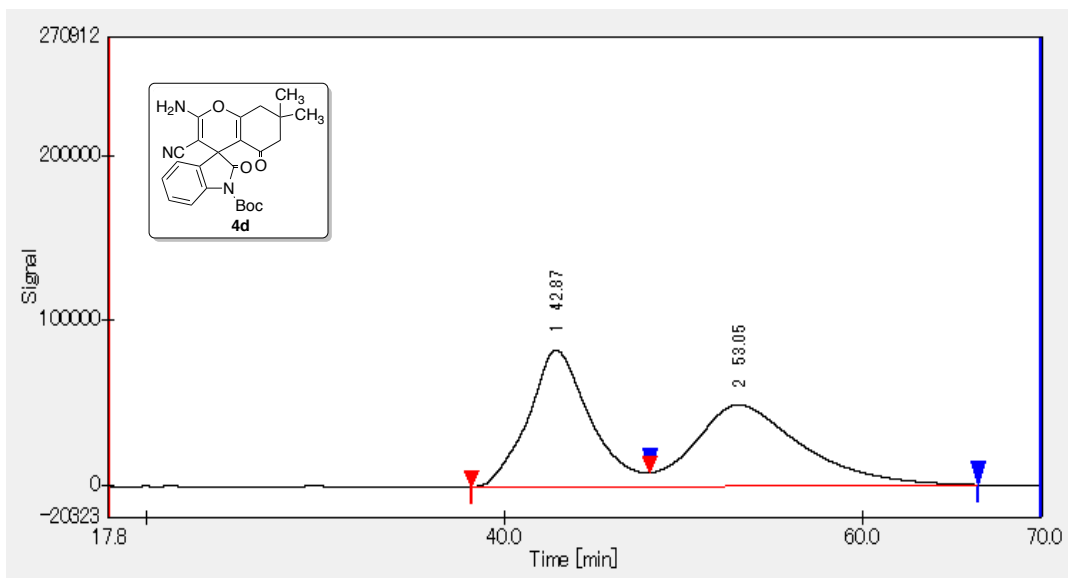

| No | Rt(min) | Area     | Area (%) | Height | NTP   | Symmetry | Resolution |
|----|---------|----------|----------|--------|-------|----------|------------|
| 1  | 42.87   | 19780874 | 49.4146  | 82620  | 725.1 | *****    | 1.174      |
| 2  | 53.05   | 20249548 | 50.5854  | 49084  | 374   | *****    | *****      |
|    |         | 40030422 | 100      | 131704 |       |          |            |

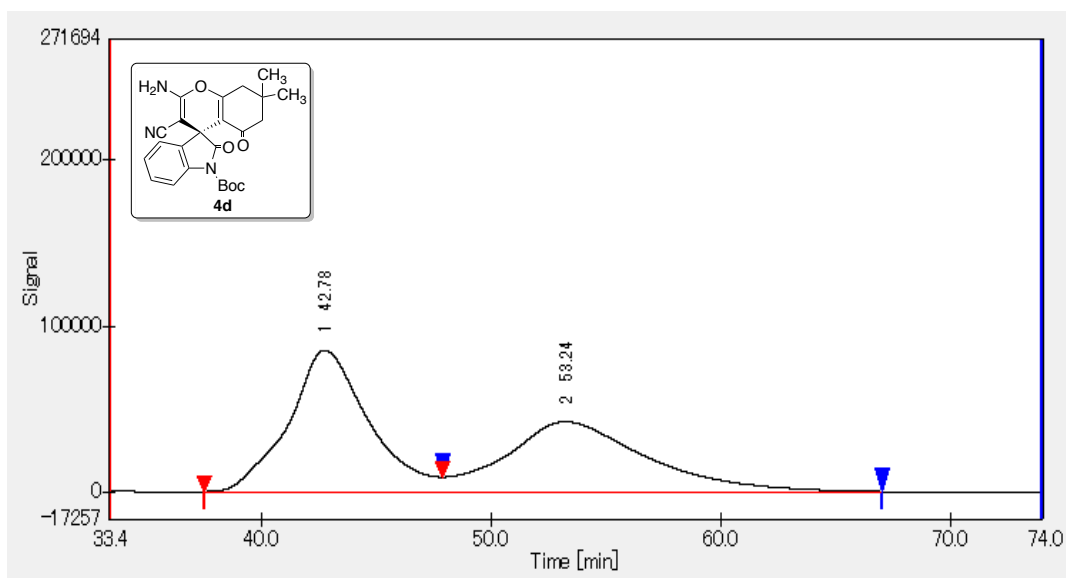

| No | Rt(min) | Area     | Area (%) | Height | NTP   | Symmetry | Resolution |
|----|---------|----------|----------|--------|-------|----------|------------|
| 1  | 42.78   | 20527526 | 53.651   | 85081  | 711   | *****    | 1.187      |
| 2  | 53.24   | 17733721 | 46.349   | 42043  | 360.4 | *****    | *****      |
|    |         | 38261247 | 100      | 127124 |       |          |            |

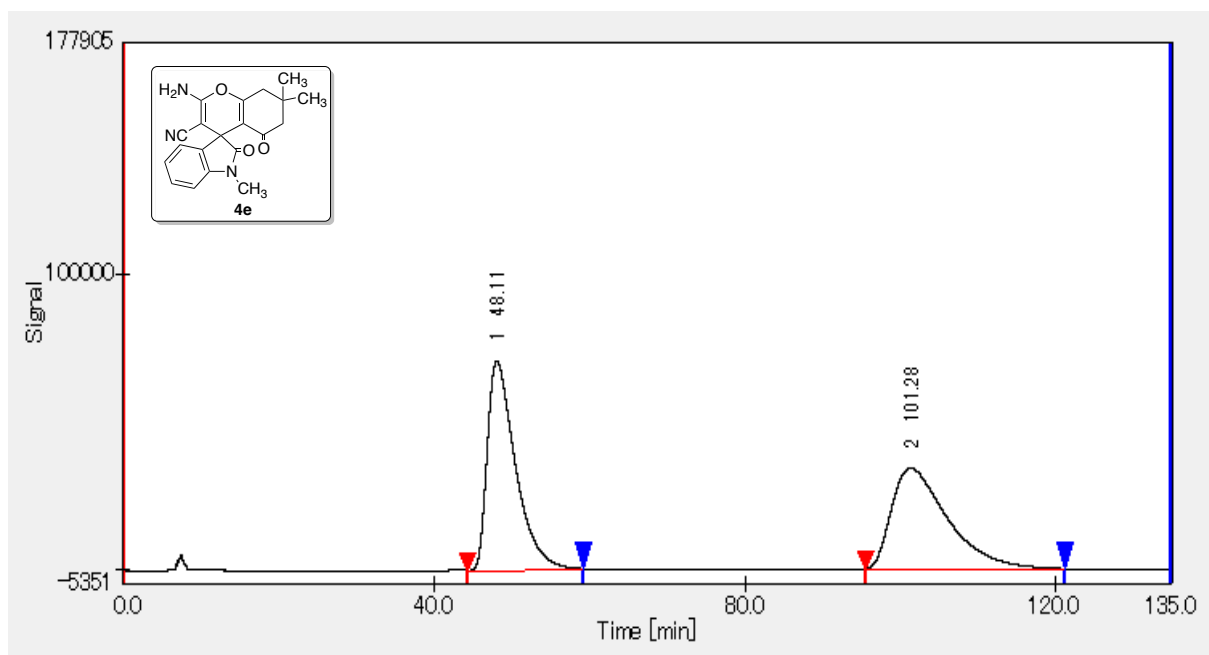

| No | Rt(min) | Area     | Area (%) | Height | NTP   | Symmetry | Resolution |
|----|---------|----------|----------|--------|-------|----------|------------|
| 1  | 48.11   | 17807493 | 50.9593  | 70879  | 764.2 | 1.83     | 5.087      |
| 2  | 101.28  | 17137062 | 49.0407  | 34145  | 844.4 | 1.888    | *****      |
|    |         | 34944554 | 100      | 105024 |       |          |            |

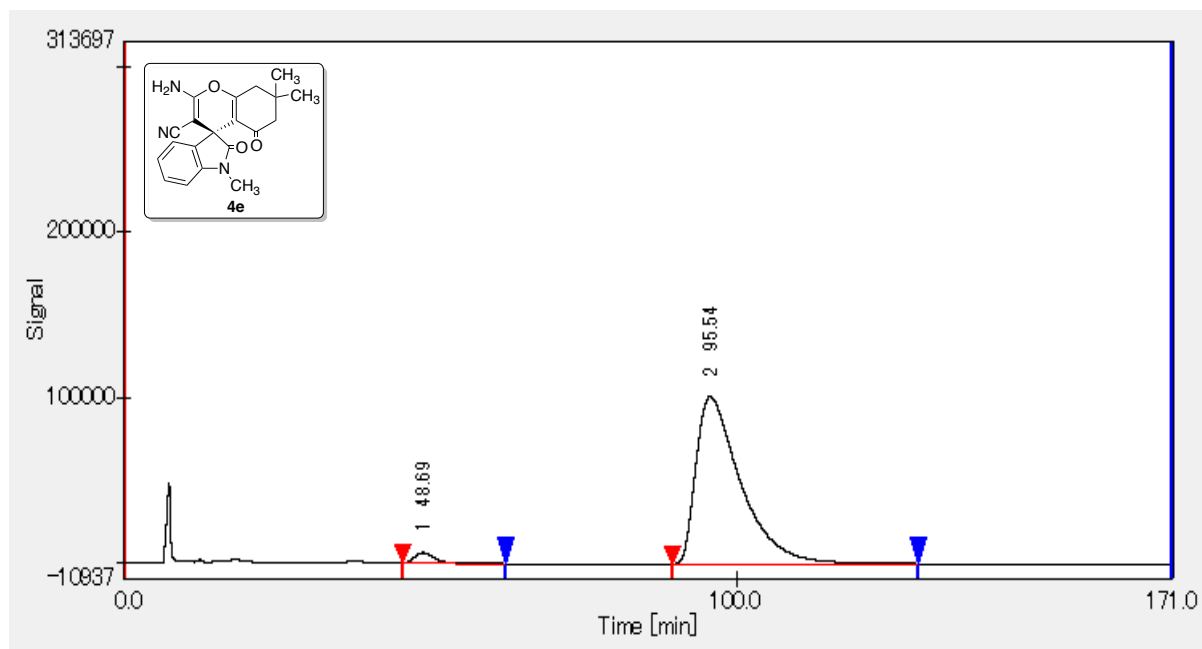

| No | Rt(min) | Area     | Area (%) | Height | NTP   | Symmetry | Resolution |
|----|---------|----------|----------|--------|-------|----------|------------|
| 1  | 48.69   | 1483284  | 2.8114   | 6387   | 998.4 | 1.462    | 4.624      |
| 2  | 95.54   | 51277118 | 97.1886  | 101149 | 734.7 | 2.073    | *****      |
|    |         | 52760402 | 100      | 107536 |       |          |            |

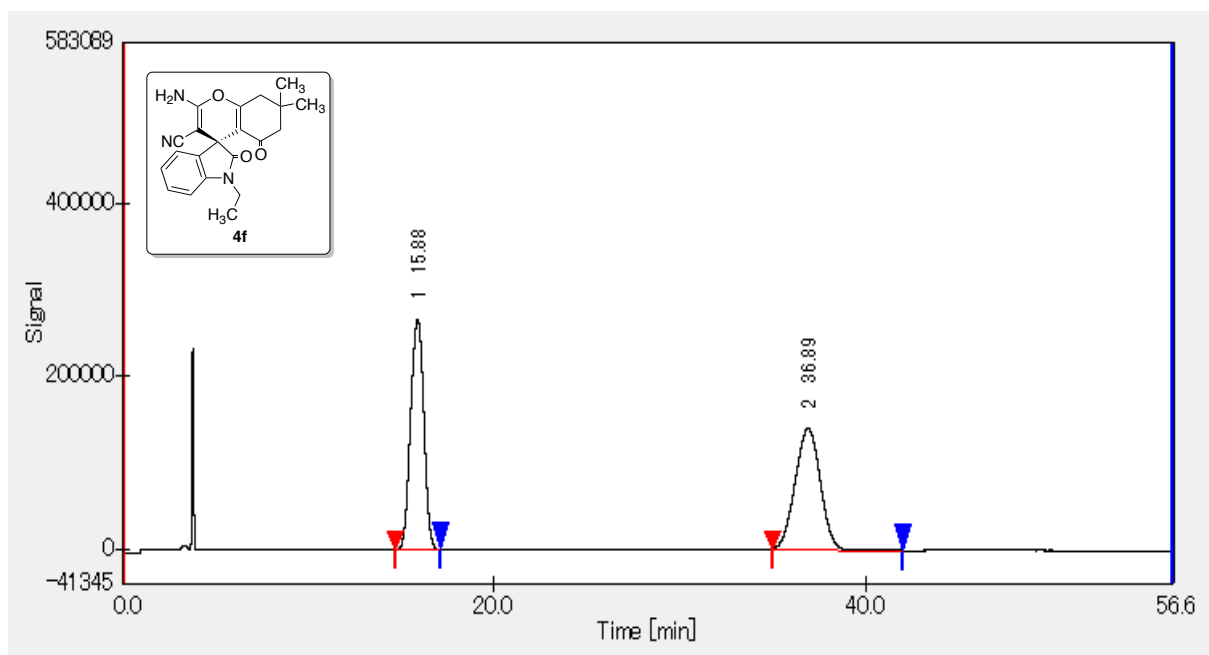

| No | Rt(min) | Area     | Area (%) | Height | NTP    | Symmetry | Resolution |
|----|---------|----------|----------|--------|--------|----------|------------|
| 1  | 15.88   | 13211841 | 50.3065  | 266057 | 2473.1 | 0.969    | 11.148     |
| 2  | 36.89   | 13050841 | 49.6935  | 139513 | 3505.2 | 0.992    | *****      |
|    |         | 26262682 | 100      | 405570 |        |          |            |

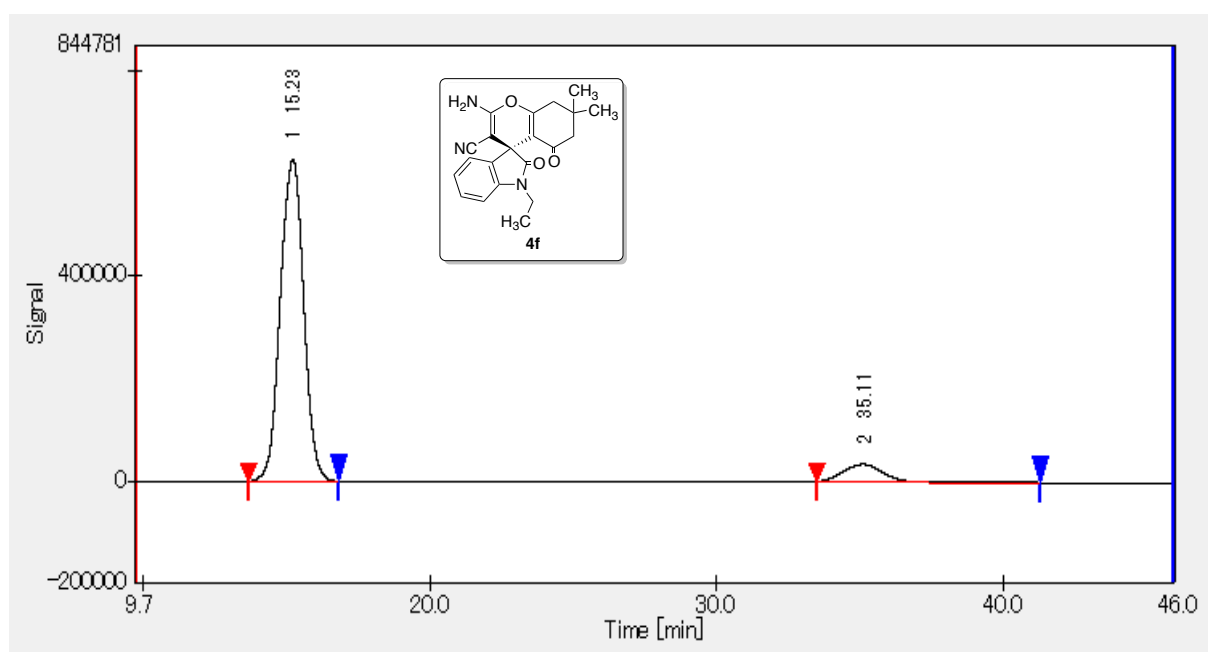

| No | Rt(min) | Area     | Area (%) | Height | NTP    | Symmetry | Resolution |
|----|---------|----------|----------|--------|--------|----------|------------|
| 1  | 15.23   | 35526078 | 91.5883  | 626420 | 1728   | 0.992    | 9.965      |
| 2  | 35.11   | 3262823  | 8.4117   | 33846  | 3096.6 | 1.049    | *****      |
|    |         | 38788901 | 100      | 660266 |        |          |            |

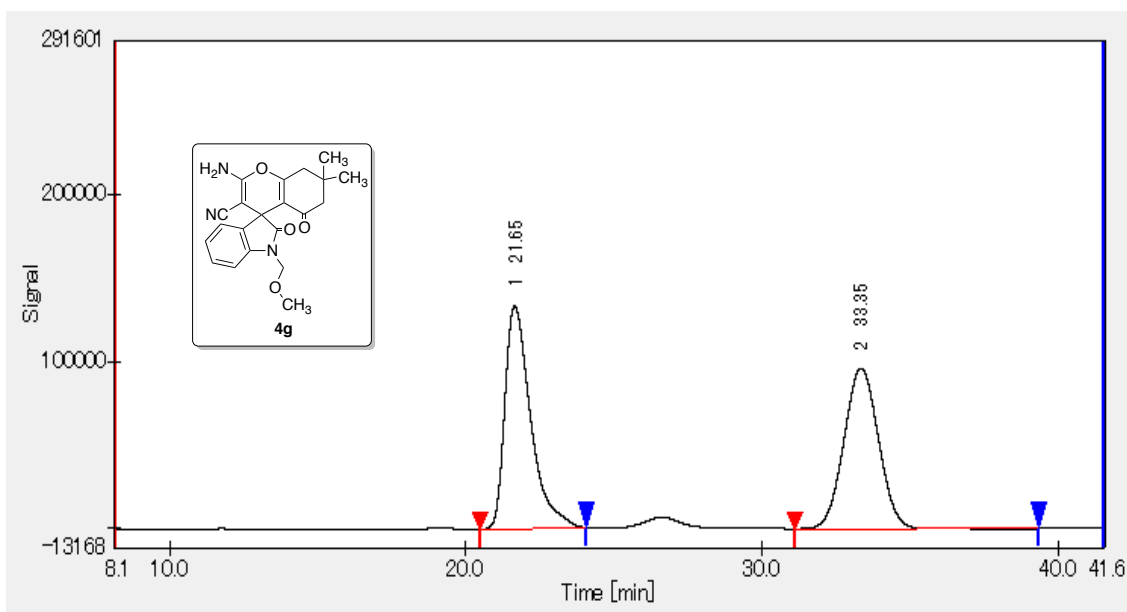

| No | Rt(min) | Area     | Area (%) | Height | NTP    | Symmetry | Resolution |
|----|---------|----------|----------|--------|--------|----------|------------|
| 1  | 21.65   | 8123007  | 50.9573  | 134098 | 2774.8 | 1.709    | 6.152      |
| 2  | 33.35   | 7817799  | 49.0427  | 96334  | 3811.6 | 1.036    | *****      |
|    |         | 15940805 | 100      | 230432 |        |          |            |

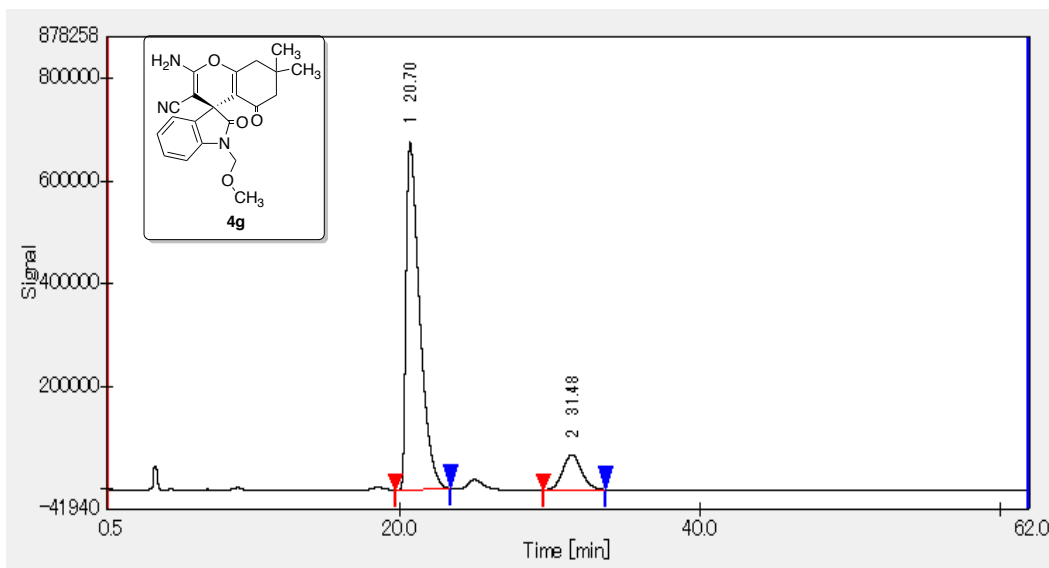

| No | Rt(min) | Area     | Area (%) | Height | NTP    | Symmetry | Resolution |
|----|---------|----------|----------|--------|--------|----------|------------|
| 1  | 20.7    | 42480951 | 87.6727  | 676242 | 2275.9 | 2.19     | 5.275      |
| 2  | 31.48   | 5973050  | 12.3273  | 68397  | 2871.7 | 1.091    | *****      |
|    |         | 48454001 | 100      | 744639 |        |          |            |

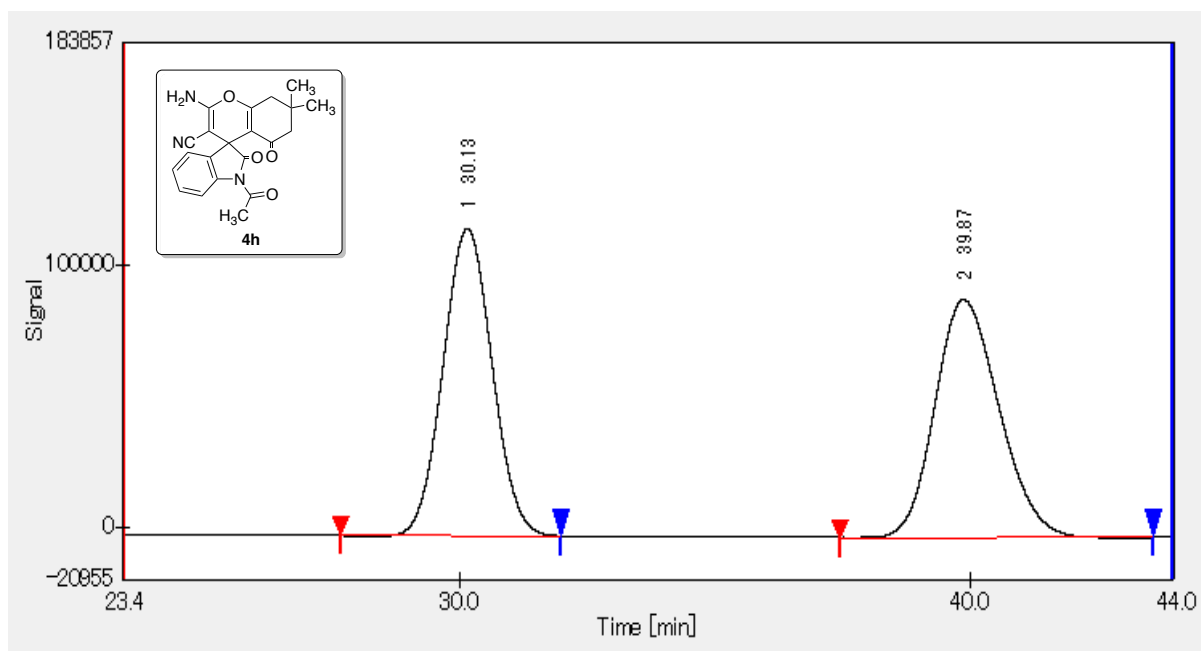

| No | Rt(min) | Area     | Area (%) | Height | NTP    | Symmetry | Resolution |
|----|---------|----------|----------|--------|--------|----------|------------|
| 1  | 30.13   | 7838416  | 49.7575  | 117117 | 4541.8 | 1.044    | 4.716      |
| 2  | 39.87   | 7914814  | 50.2425  | 90611  | 4637.4 | 1.178    | *****      |
|    |         | 15753230 | 100      | 207728 |        |          |            |

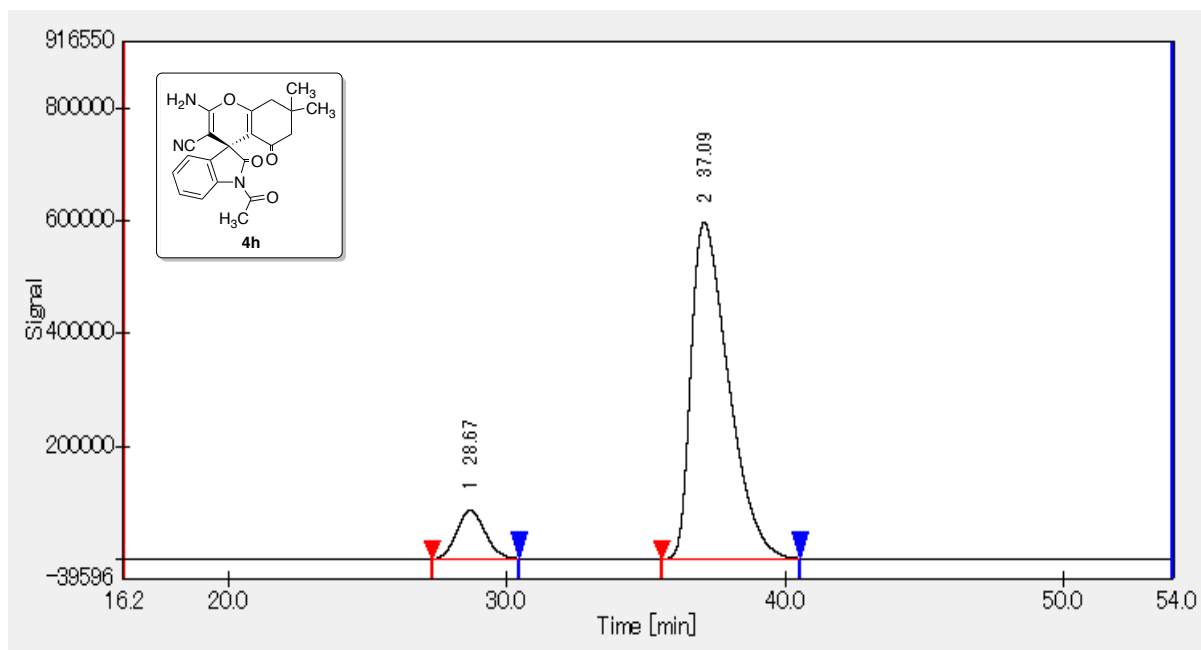

| No | Rt(min) | Area     | Area (%) | Height | NTP    | Symmetry | Resolution |
|----|---------|----------|----------|--------|--------|----------|------------|
| 1  | 28.67   | 6106120  | 9.8016   | 85872  | 3598.4 | 1.115    | 3.785      |
| 2  | 37.09   | 56191173 | 90.1984  | 599002 | 3421.6 | 1.682    | *****      |
|    |         | 62297293 | 100      | 684874 |        |          |            |



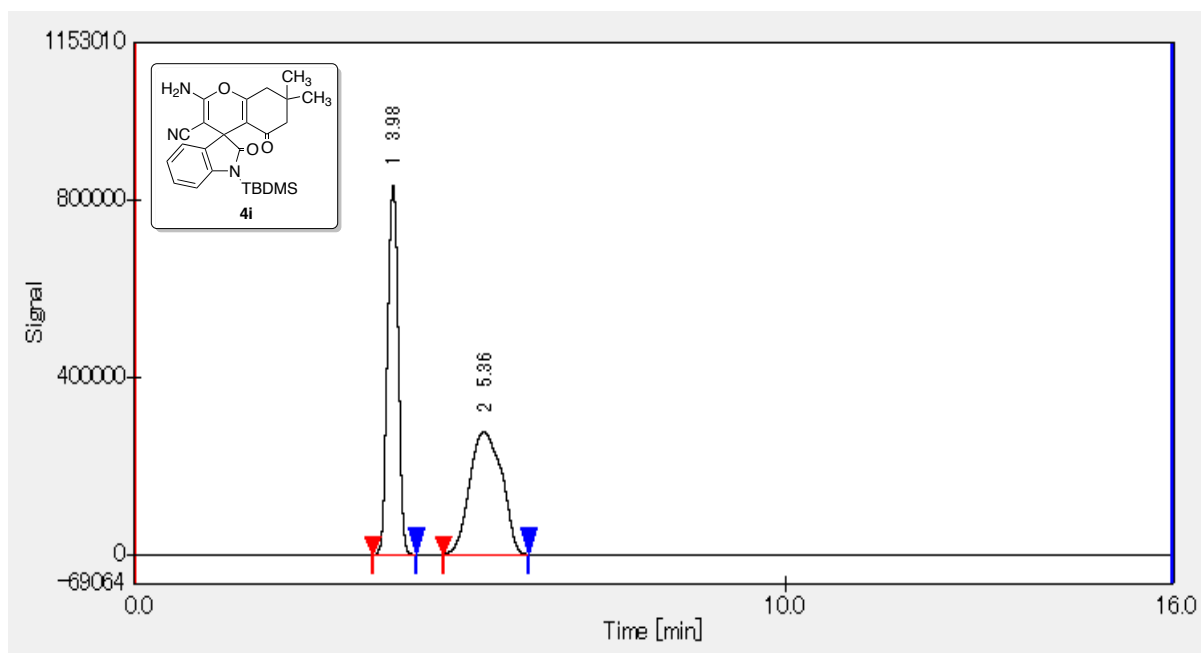

| No | Rt(min) | Area     | Area (%) | Height  | NTP    | Symmetry | Resolution |
|----|---------|----------|----------|---------|--------|----------|------------|
| 1  | 3.98    | 9665464  | 50.2839  | 835296  | 2939.6 | 0.99     | 2.415      |
| 2  | 5.36    | 9556319  | 49.7161  | 276389  | 629.4  | 1.07     | *****      |
|    |         | 19221783 | 100      | 1111685 |        |          |            |

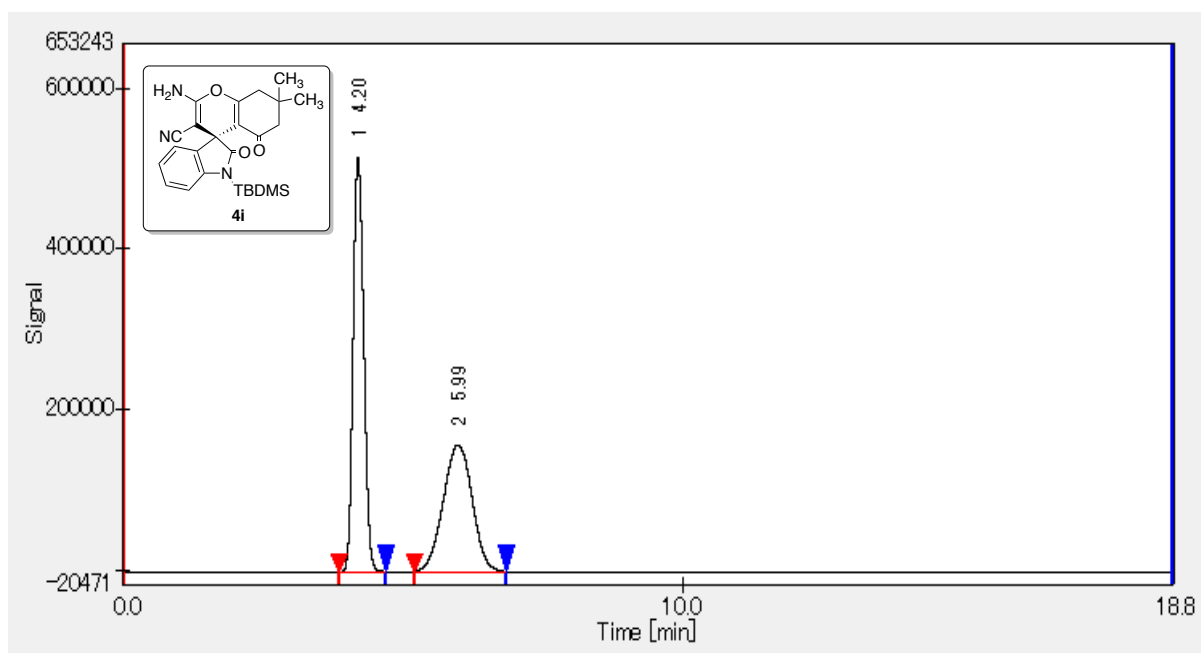

| No | Rt(min) | Area     | Area (%) | Height | NTP    | Symmetry | Resolution |
|----|---------|----------|----------|--------|--------|----------|------------|
| 1  | 4.2     | 6802814  | 54.3735  | 515639 | 2415.9 | 1.13     | 2.759      |
| 2  | 5.99    | 5708446  | 45.6265  | 157847 | 631.1  | 0.985    | *****      |
|    |         | 12511259 | 100      | 673486 |        |          |            |

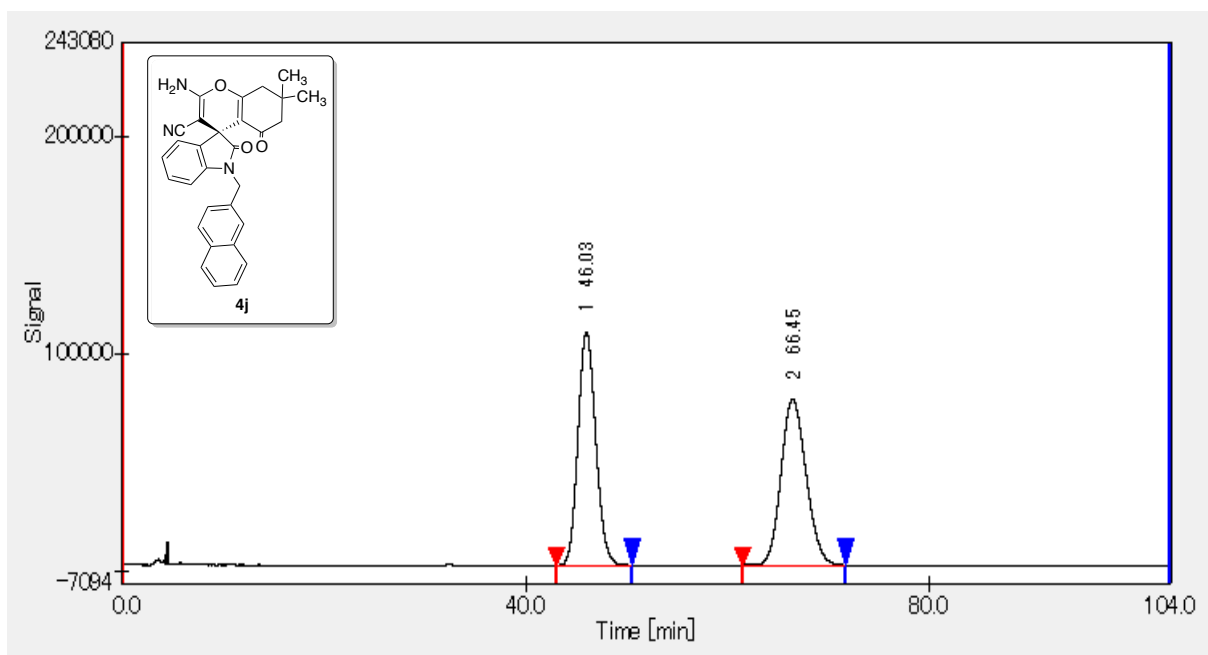

| No | Rt(min) | Area     | Area (%) | Height | NTP    | Symmetry | Resolution |
|----|---------|----------|----------|--------|--------|----------|------------|
| 1  | 46.03   | 13174526 | 49.8377  | 107934 | 3182.8 | 1.124    | 5.17       |
| 2  | 66.45   | 13260350 | 50.1623  | 76470  | 3288   | 1.14     | *****      |
|    |         | 26434877 | 100      | 184404 |        |          |            |

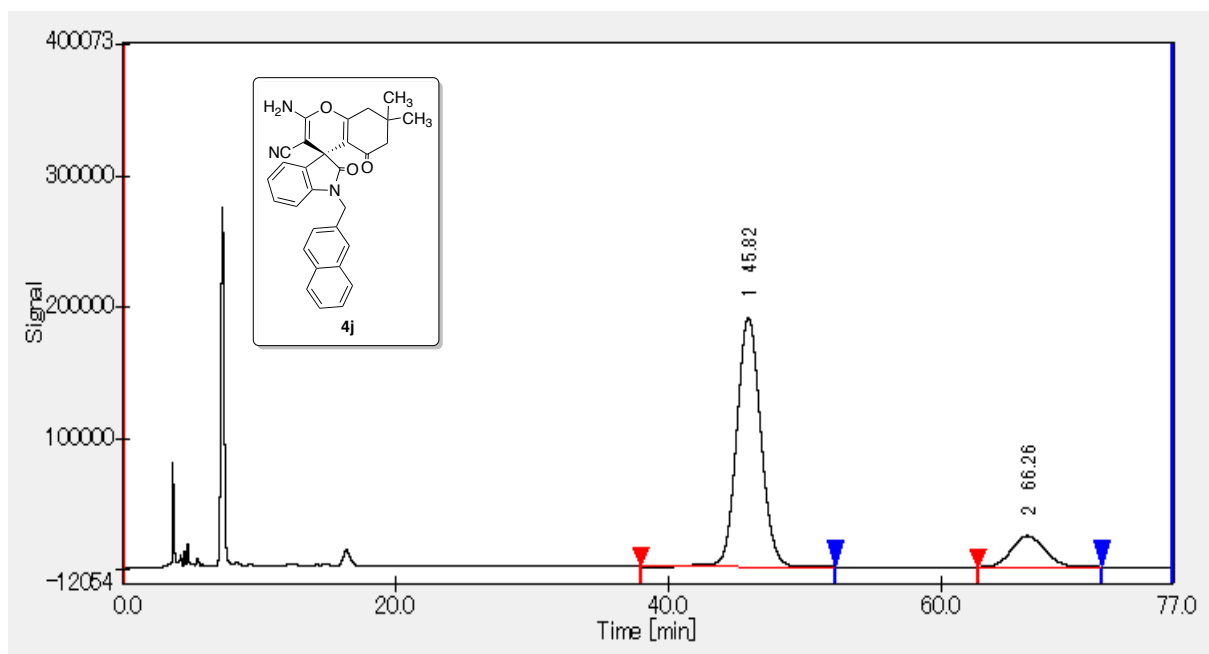

| No | Rt(min) | Area     | Area (%) | Height | NTP    | Symmetry | Resolution |
|----|---------|----------|----------|--------|--------|----------|------------|
| 1  | 45.82   | 23289874 | 85.5259  | 189832 | 3206   | 1.083    | 5.302      |
| 2  | 66.26   | 3941504  | 14.4741  | 23519  | 3510.9 | 1.094    | *****      |
|    |         | 27231378 | 100      | 213351 |        |          |            |

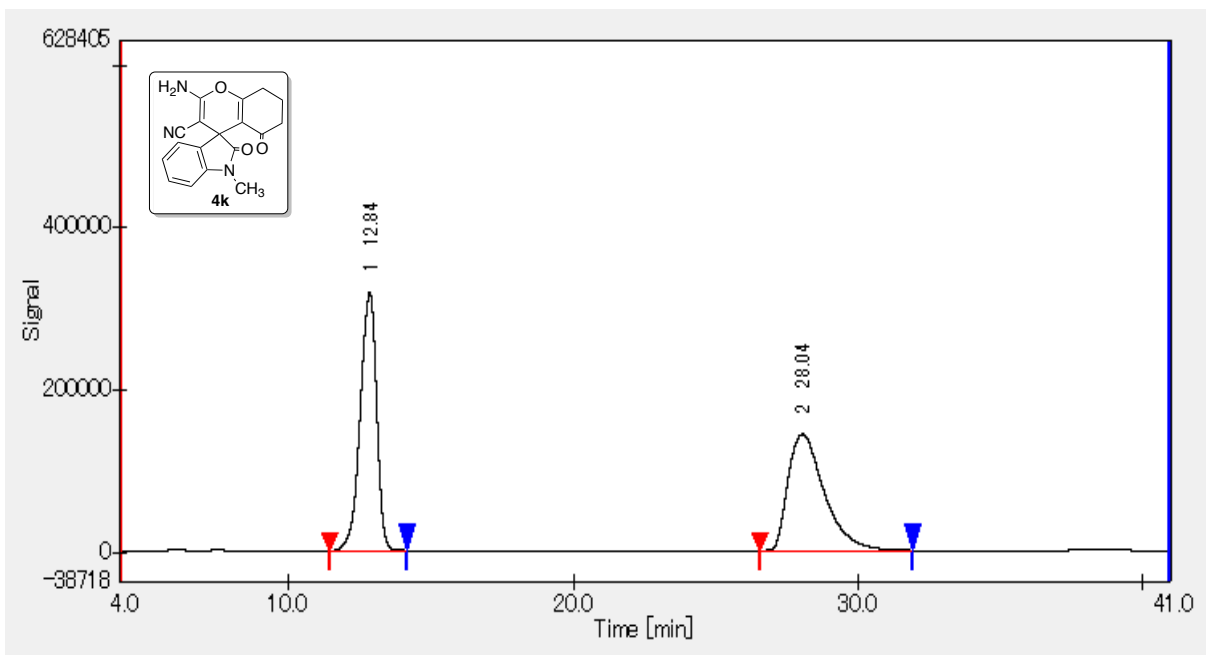

| No | Rt(min) | Area     | Area (%) | Height | NTP    | Symmetry | Resolution |
|----|---------|----------|----------|--------|--------|----------|------------|
| 1  | 12.84   | 12738685 | 50.0749  | 318002 | 2405.1 | 0.842    | 8.85       |
| 2  | 28.04   | 12700573 | 49.9251  | 143196 | 2207.4 | 1.628    | *****      |
|    |         | 25439258 | 100      | 461198 |        |          |            |

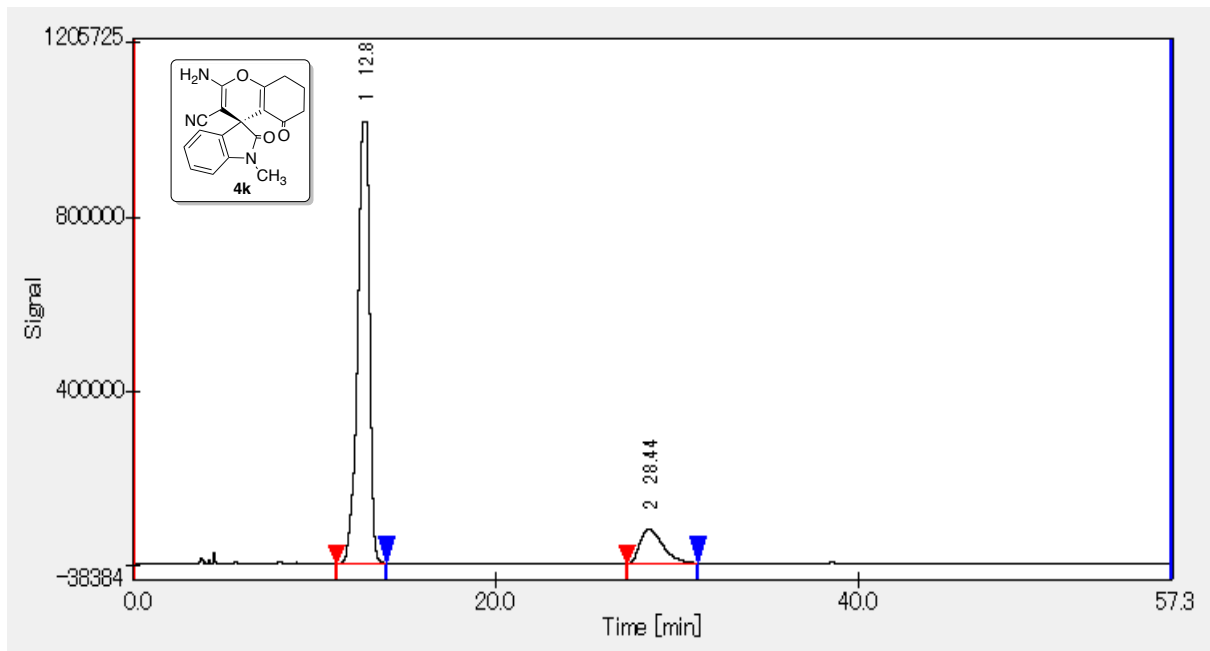

| No | Rt(min) | Area     | Area (%) | Height  | NTP    | Symmetry | Resolution |
|----|---------|----------|----------|---------|--------|----------|------------|
| 1  | 12.81   | 46767762 | 87.1935  | 1013708 | 1827.3 | 0.764    | 8.725      |
| 2  | 28.44   | 6868998  | 12.8065  | 78163   | 2276.2 | 1.511    | *****      |
|    |         | 53636760 | 100      | 1091871 |        |          |            |

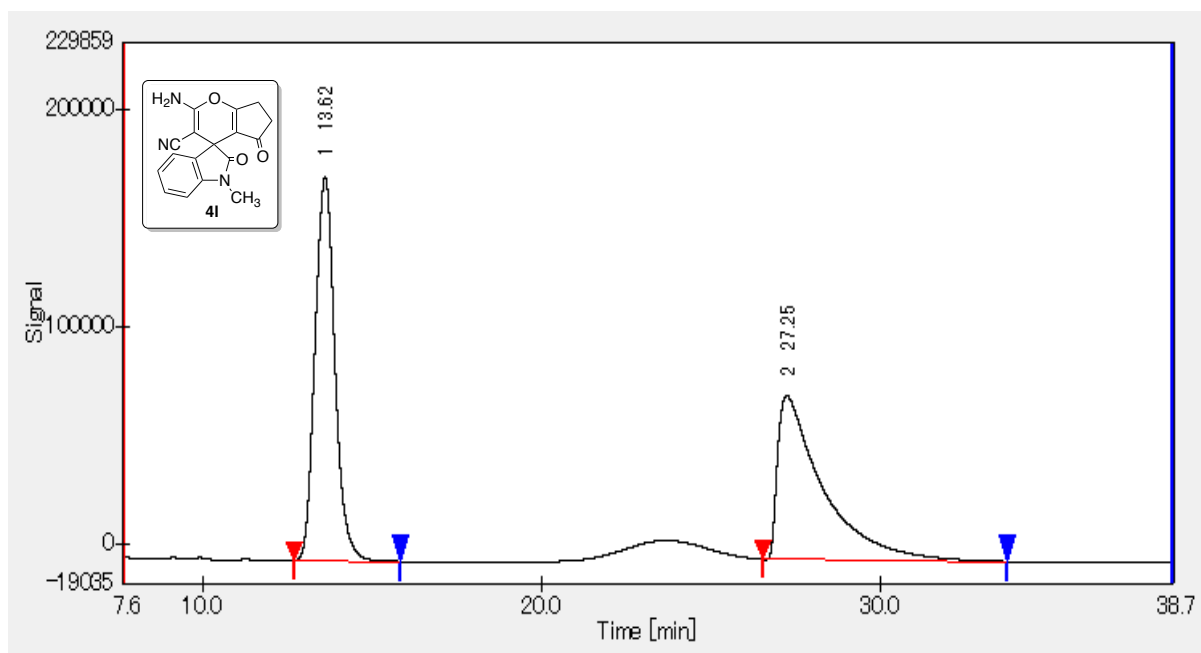

| No | Rt(min) | Area     | Area (%) | Height | NTP    | Symmetry | Resolution |
|----|---------|----------|----------|--------|--------|----------|------------|
| 1  | 13.62   | 7212661  | 50.8141  | 176578 | 2541.9 | 1.127    | 7.047      |
| 2  | 27.25   | 6981539  | 49.1859  | 75284  | 1529.9 | 4.246    | *****      |
|    |         | 14194200 | 100      | 251862 |        |          |            |

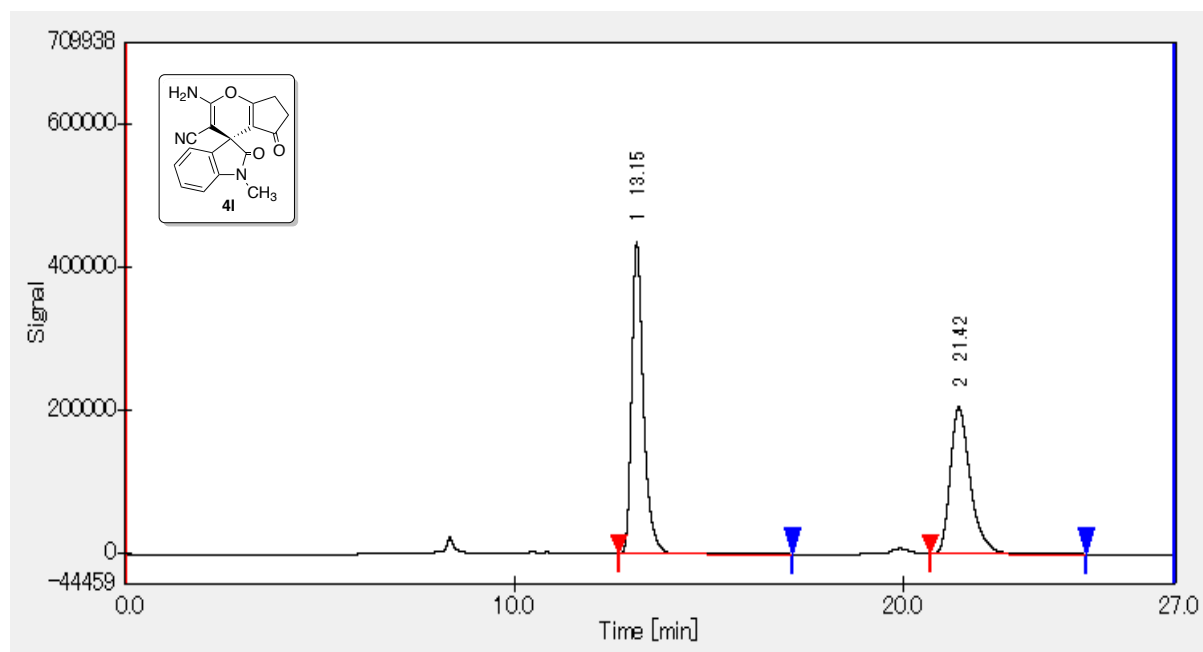

| No | Rt(min) | Area     | Area (%) | Height | NTP    | Symmetry | Resolution |
|----|---------|----------|----------|--------|--------|----------|------------|
| 1  | 13.15   | 9205943  | 55.5808  | 435734 | 8096.7 | 1.406    | 10.531     |
| 2  | 21.42   | 7357224  | 44.4192  | 203901 | 7546.4 | 1.386    | *****      |
|    |         | 16563166 | 100      | 639635 |        |          |            |

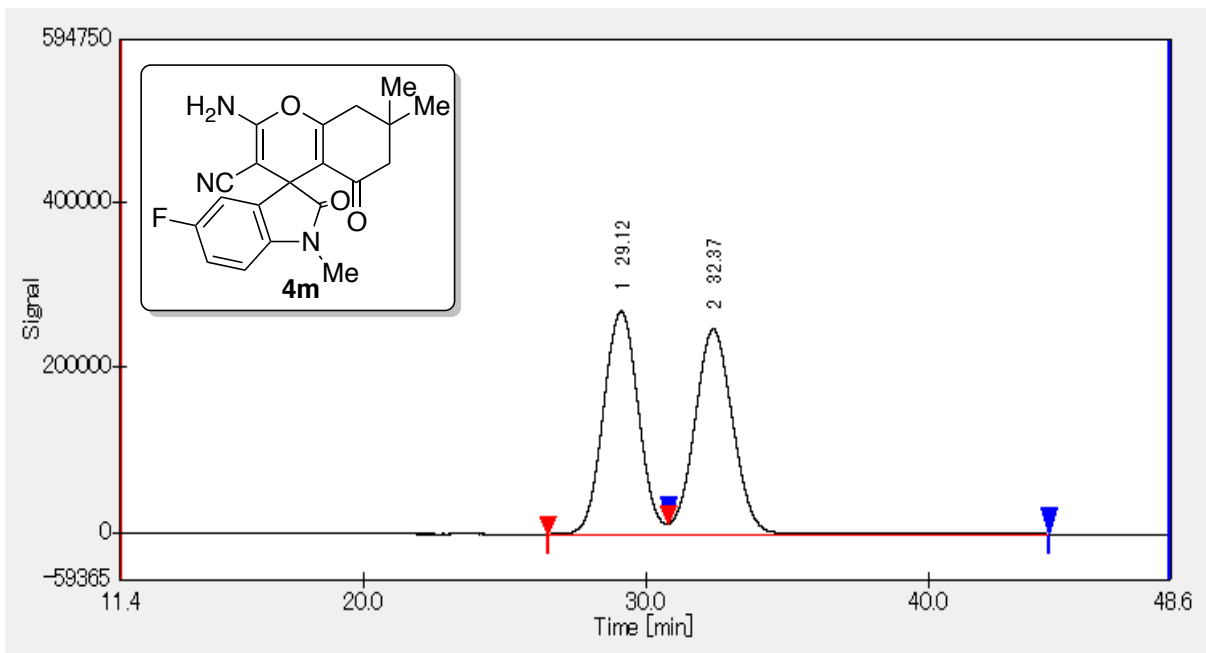

| No | Rt(min) | Area     | Area (%) | Heights | NTP    | Symmetry | Resolution |
|----|---------|----------|----------|---------|--------|----------|------------|
| 1  | 29.12   | 23162075 | 50.1587  | 269774  | 2602.6 | 1.044    | 1.368      |
| 2  | 32.37   | 23015535 | 49.8413  | 247941  | 2751.1 | *****    | *****      |
|    |         | 46177610 | 100      | 517715  |        |          |            |

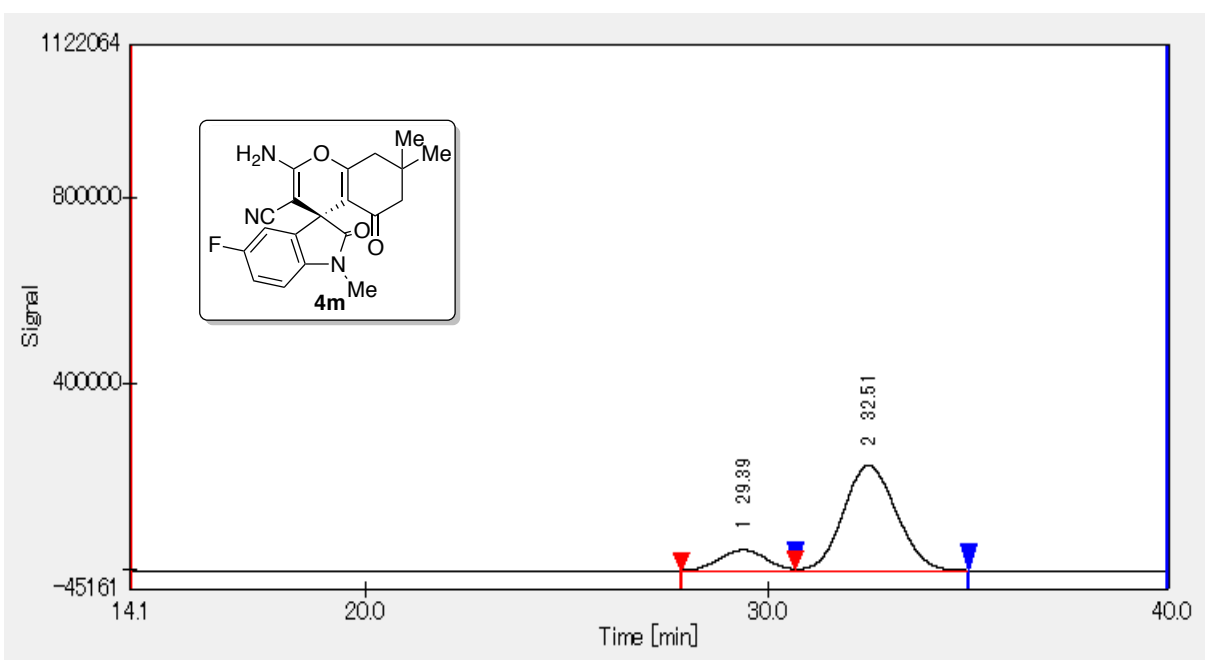

| No | Rt(min) | Area     | Area (%) | Heights | NTP    | Symmetry | Resolution |
|----|---------|----------|----------|---------|--------|----------|------------|
| 1  | 29.39   | 3527546  | 14.6124  | 43766   | 3006.8 | *****    | 1.367      |
| 2  | 32.51   | 20613240 | 85.3876  | 225576  | 2863.5 | 1.081    | *****      |
|    |         | 24140786 | 100      | 269342  |        |          |            |

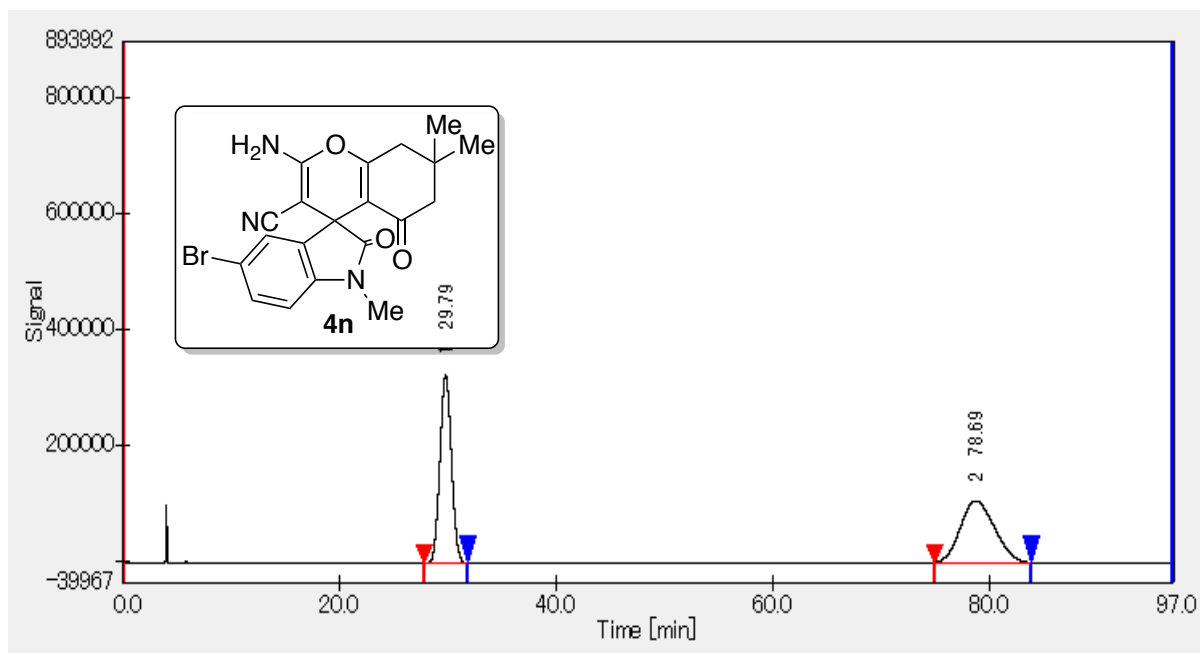

| No | Rt (min) | Area     | Area (%) | Heights | NTP    | Symmetry | Resolution |
|----|----------|----------|----------|---------|--------|----------|------------|
| 1  | 29.79    | 24200675 | 50.8189  | 324952  | 3580.4 | 1.04     | 12.419     |
| 2  | 78.69    | 23420778 | 49.1811  | 106495  | 2861.8 | 1.153    | *****      |
|    |          | 47621453 | 100      | 431447  |        |          |            |

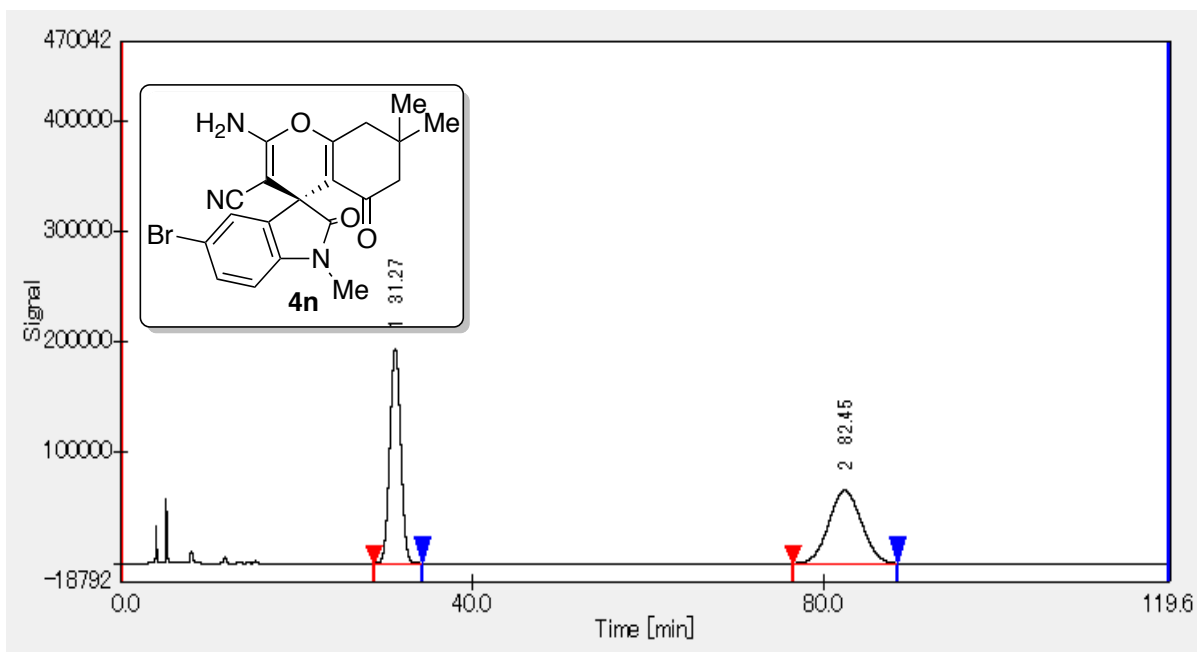

| No | Rt (min) | Area     | Area (%) | Heights | NTP    | Symmetry | Resolution |
|----|----------|----------|----------|---------|--------|----------|------------|
| 1  | 31.27    | 16826523 | 49.632   | 194512  | 2998.6 | 1.017    | 11.122     |
| 2  | 82.45    | 17076024 | 50.368   | 65862   | 2272.8 | 1.037    | *****      |
|    |          | 33902547 | 100      | 260374  |        |          |            |

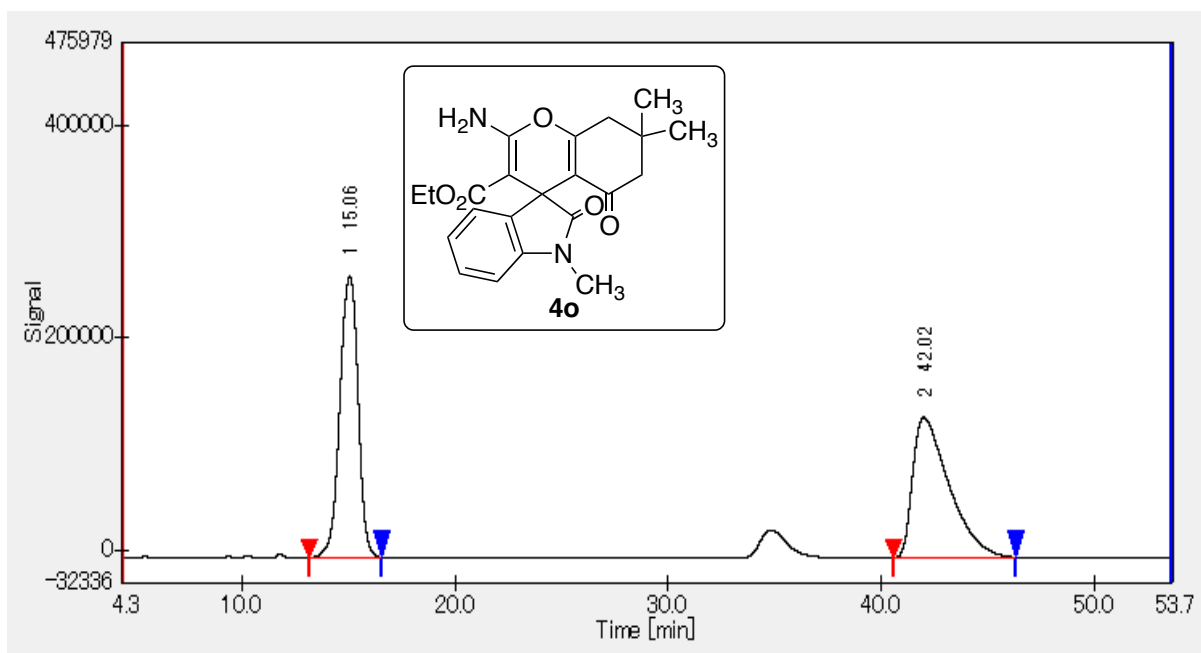

| No | Rt(min) | Area     | Area (%) | Height | NTP    | Symmetry | Resolution |
|----|---------|----------|----------|--------|--------|----------|------------|
| 1  | 15.06   | 15766467 | 50.1142  | 264006 | 1585.4 | 0.927    | 11.219     |
| 2  | 42.02   | 15694599 | 49.8858  | 131985 | 2603.3 | 2.004    | *****      |
|    |         | 31461067 | 100      | 395991 |        |          |            |

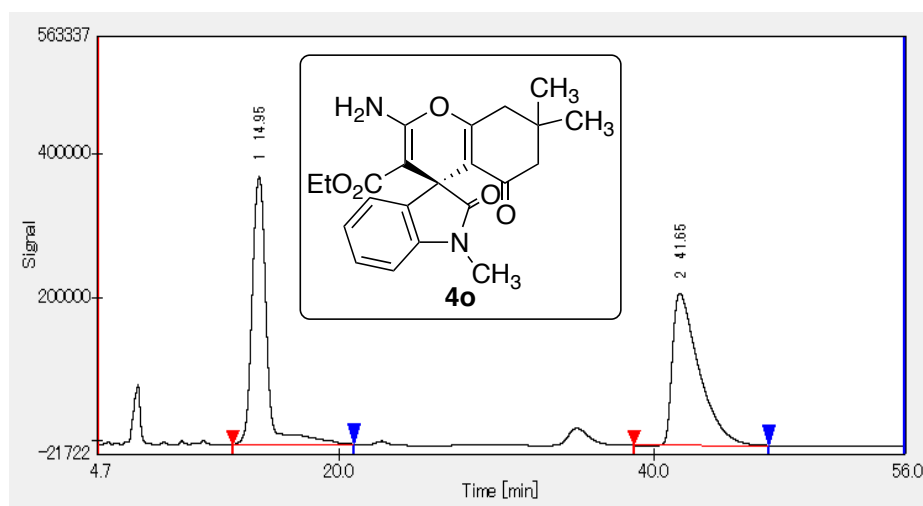

| No | Rt(min) | Area     | Area (%) | Height | NTP    | Symmetry | Resolution |
|----|---------|----------|----------|--------|--------|----------|------------|
| 1  | 14.95   | 24216280 | 49.2231  | 374286 | 1600.3 | 1.053    | 11.126     |
| 2  | 41.65   | 24980690 | 50.7769  | 213168 | 2539.3 | 2.35     | *****      |
|    |         | 49196970 | 100      | 587454 |        |          |            |

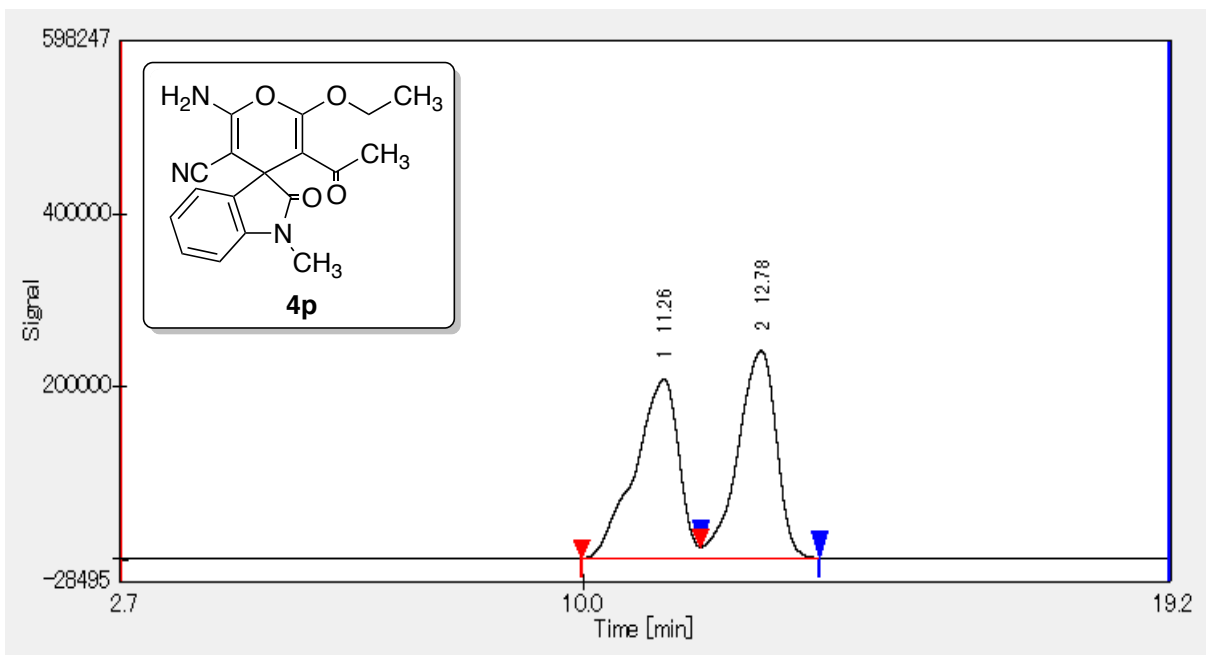

| No | Rt(min) | Area     | Area (%) | Height | NTP    | Symmetry | Resolution |
|----|---------|----------|----------|--------|--------|----------|------------|
| 1  | 11.26   | 9941890  | 49.5818  | 207887 | 1253.2 | *****    | 1.277      |
| 2  | 12.78   | 10109588 | 50.4182  | 240162 | 2086   | *****    | *****      |
|    |         | 20051478 | 100      | 448049 |        |          |            |

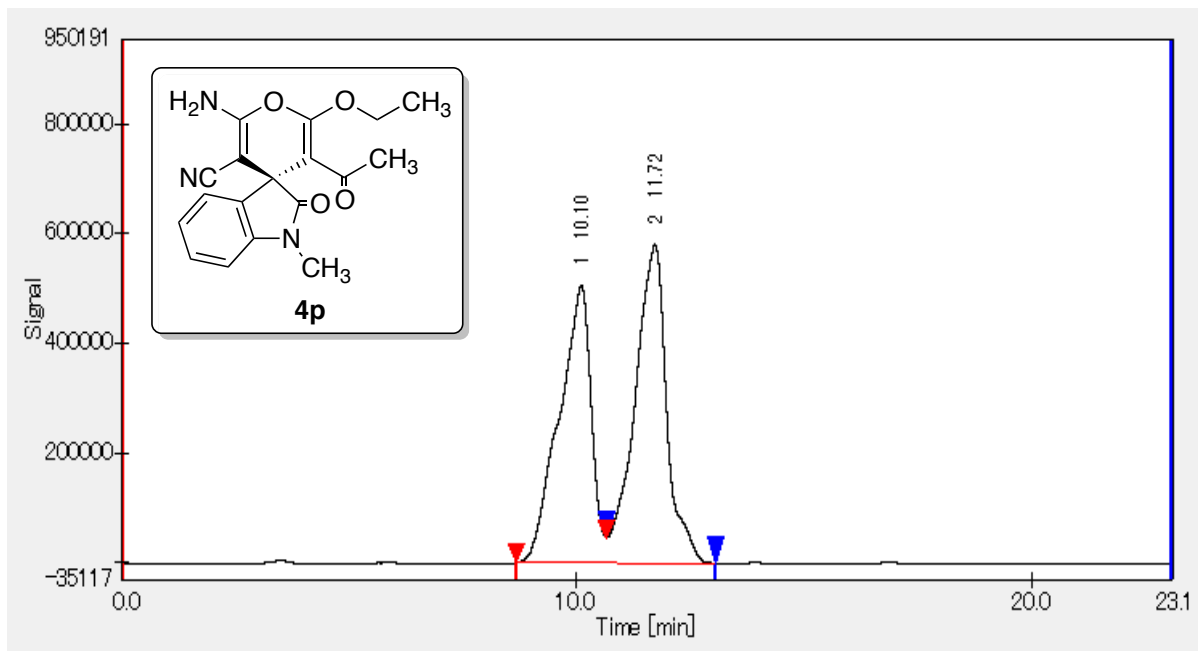

| No | Rt(min) | Area     | Area (%) | Height  | NTP    | Symmetry | Resolution |
|----|---------|----------|----------|---------|--------|----------|------------|
| 1  | 10.1    | 24739354 | 46.6594  | 506425  | 966.9  | *****    | 1.251      |
| 2  | 11.72   | 28281805 | 53.3406  | 580529  | 1309.8 | *****    | *****      |
|    |         | 53021160 | 100      | 1086954 |        |          |            |



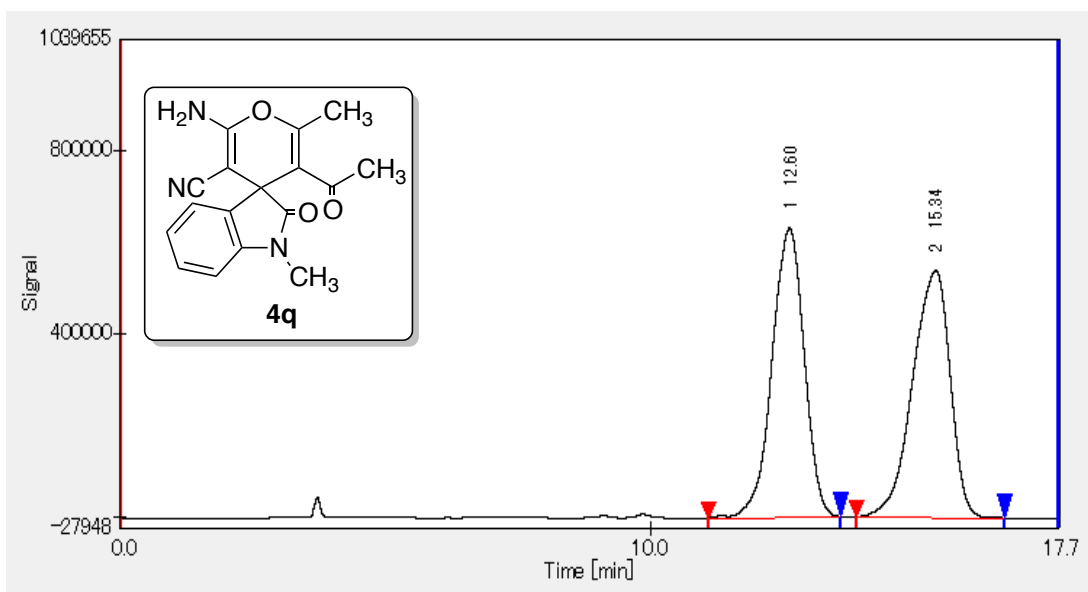

| No | Rt(min) | Area     | Area (%) | Height  | NTP    | Symmetry | Resolution |
|----|---------|----------|----------|---------|--------|----------|------------|
| 1  | 12.6    | 26594951 | 50.1033  | 630761  | 2056.5 | 0.91     | 2.295      |
| 2  | 15.34   | 26485246 | 49.8967  | 539053  | 2302.2 | 0.824    | *****      |
|    |         | 53080198 | 100      | 1169814 |        |          |            |

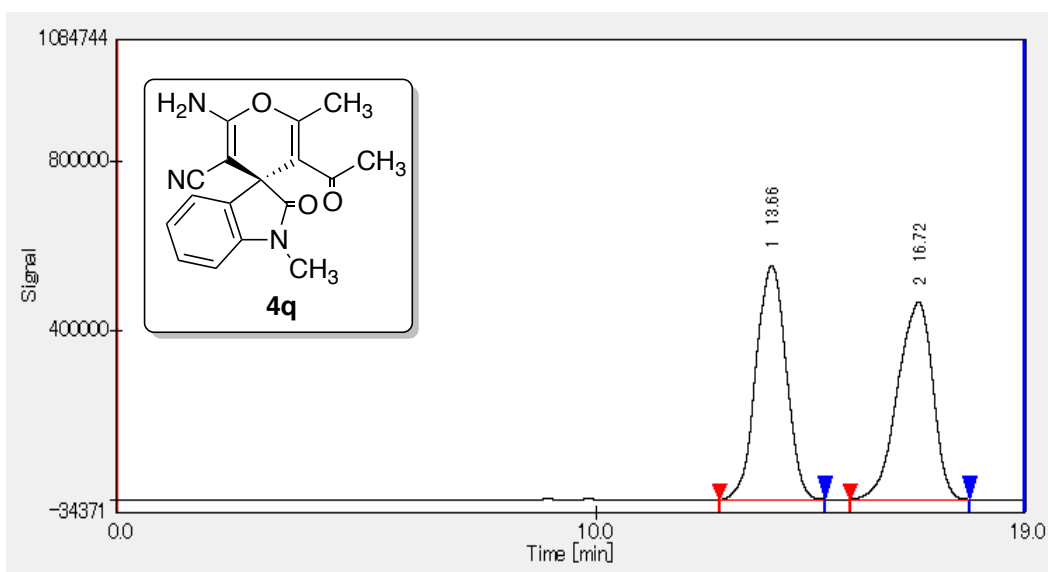

| No | Rt(min) | Area     | Area (%) | Height  | NTP    | Symmetry | Resolution |
|----|---------|----------|----------|---------|--------|----------|------------|
| 1  | 13.66   | 24217473 | 50.4458  | 553616  | 2318.6 | 0.974    | 2.5        |
| 2  | 16.72   | 23789488 | 49.5542  | 467506  | 2582.3 | 0.842    | *****      |
|    |         | 48006962 | 100      | 1021122 |        |          |            |

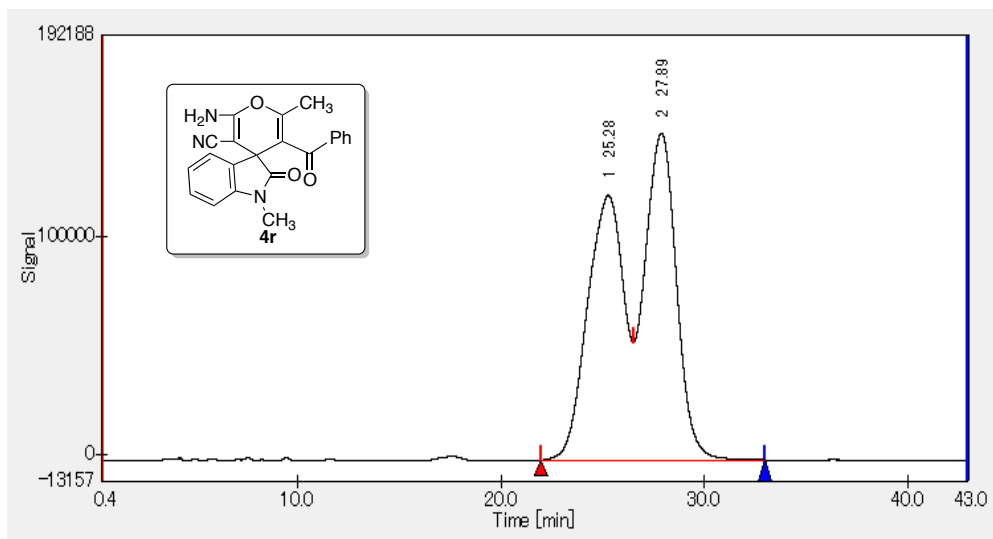

| No | Rt(min) | Area     | Area (%) | Height | NTP    | Symmetry | Resolution |
|----|---------|----------|----------|--------|--------|----------|------------|
| 1  | 25.28   | 15269436 | 48.2001  | 121750 | 919    | *****    | 0.836      |
| 2  | 27.89   | 16409815 | 51.7999  | 150411 | 1477.8 | *****    | *****      |
|    |         | 31679251 | 100      | 272161 |        |          |            |

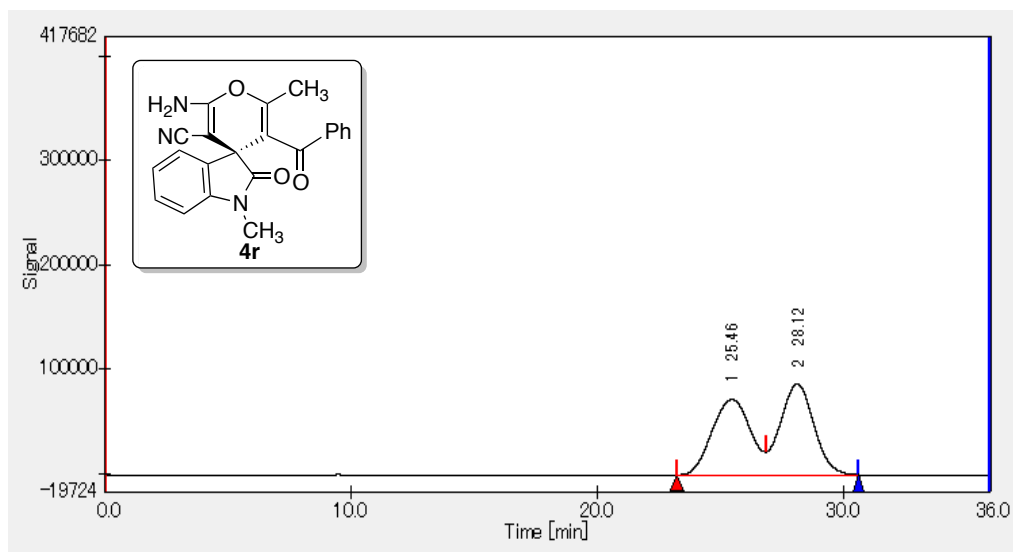

| No | Rt(min) | Area     | Area(%) | Height | NTP    | Symmetry | Resolution |
|----|---------|----------|---------|--------|--------|----------|------------|
| 1  | 25.46   | 7997271  | 49.0036 | 72784  | 1214.8 | *****    | 0.973      |
| 2  | 28.12   | 8322478  | 50.9964 | 87462  | 1974.9 | *****    | *****      |
|    |         | 16319749 | 100     | 160246 |        |          |            |

### Gram-scale experiment:

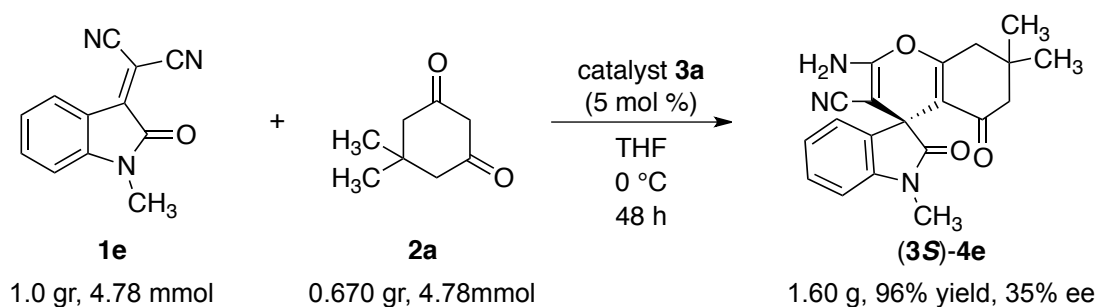

To a solution of **2a** (0.670 gr, 4.78 mmol) in 100 mL round bottom-flask containing in dry THF (20 mL) was added catalyst **3a** (0.144 gr, 5 mol %). The reaction mixture was allowed to stir at 0 °C for 1h, followed by added *N*-methyl-3-dicyano-oxindoline **1e** (1.0 gr, 4.78 mmol) at 0 °C. The reaction mixture was allowed to stir at the same temperature for 48 h. After 48h the starting materials were completely consumed indicated by TLC and the reaction mixture suspension was simply filtered using Buchman filter paper to afford product **4e** in pure form.

For racemic **4e** HPLC chart (see page no: S5) in this supporting information file.

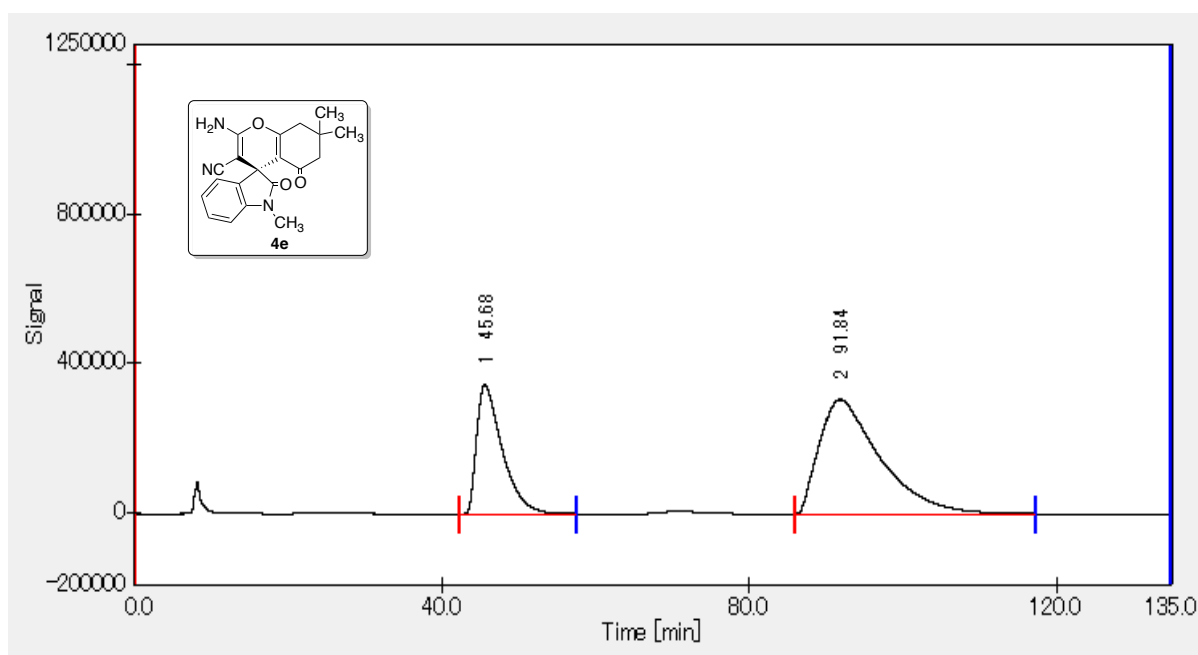

| No | Rt(min) | Area     | Area(%) | Height | NTP   | Symmetry | Resolution |
|----|---------|----------|---------|--------|-------|----------|------------|
| 1  | 45.68   | 79894736 | 32.1297 | 347994 | 813.8 | 1.908    | 4.223      |
| 2  | 91.84   | 1.69E+08 | 67.8703 | 308554 | 565.1 | 1.935    | *****      |
|    |         | 2.49E+08 | 100     | 656548 |       |          |            |

### 3. Copies of $^1\text{H}$ NMR and $^{13}\text{C}$ NMR of **4b-r**

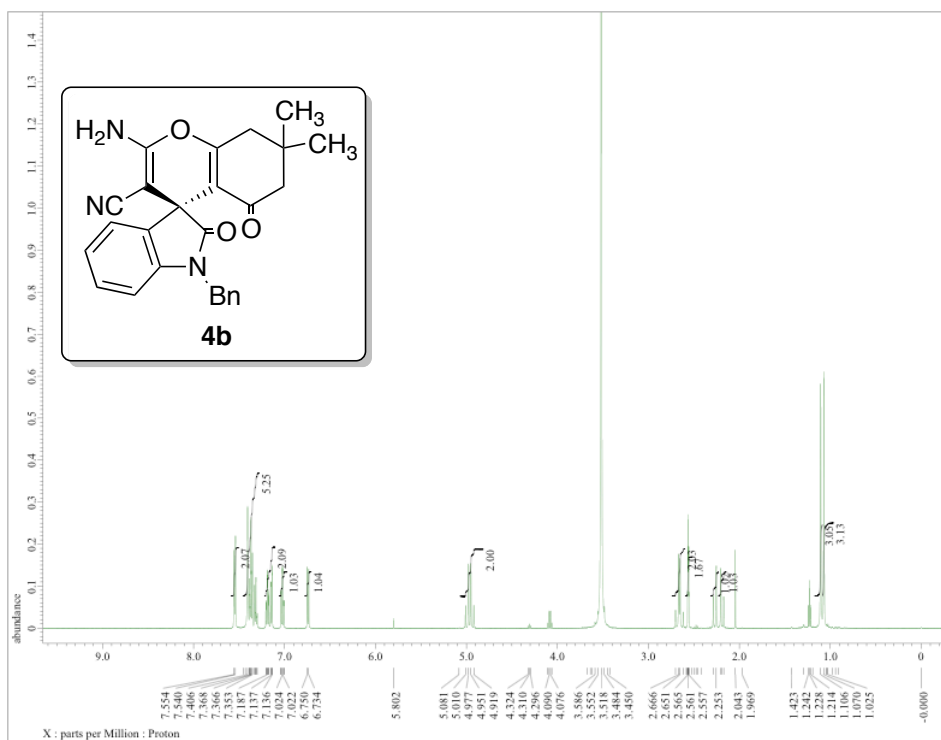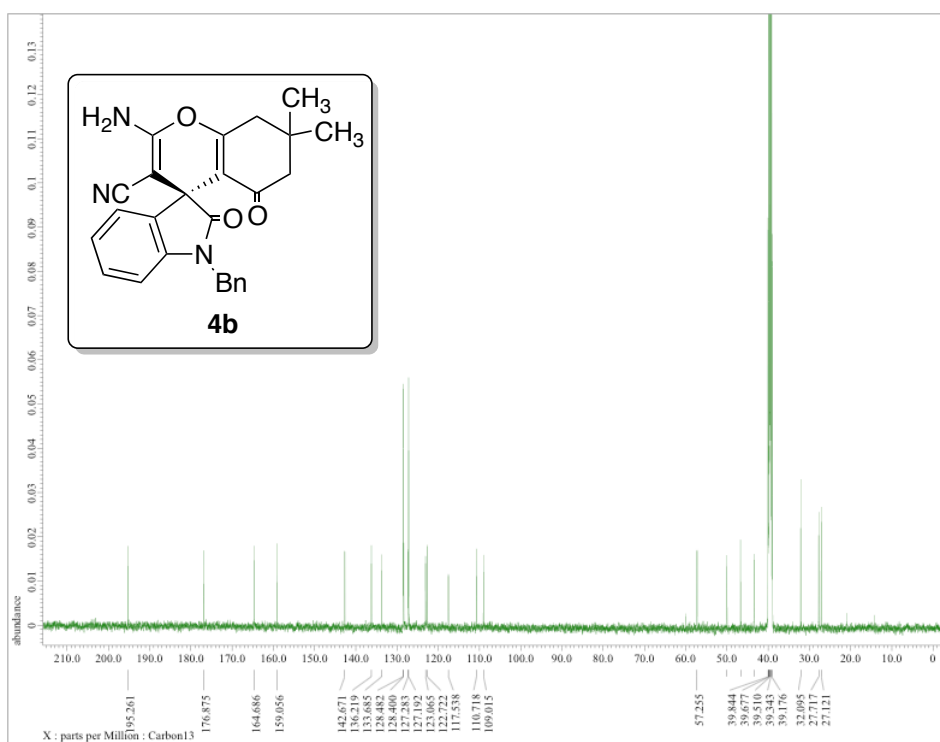

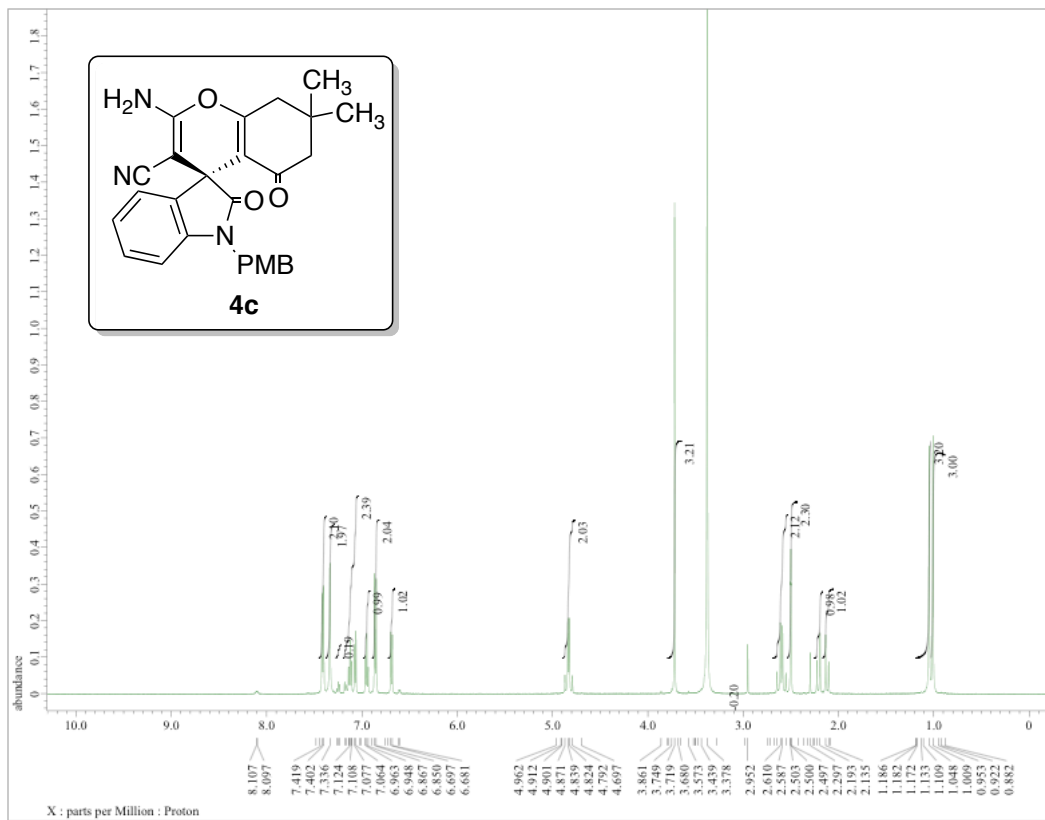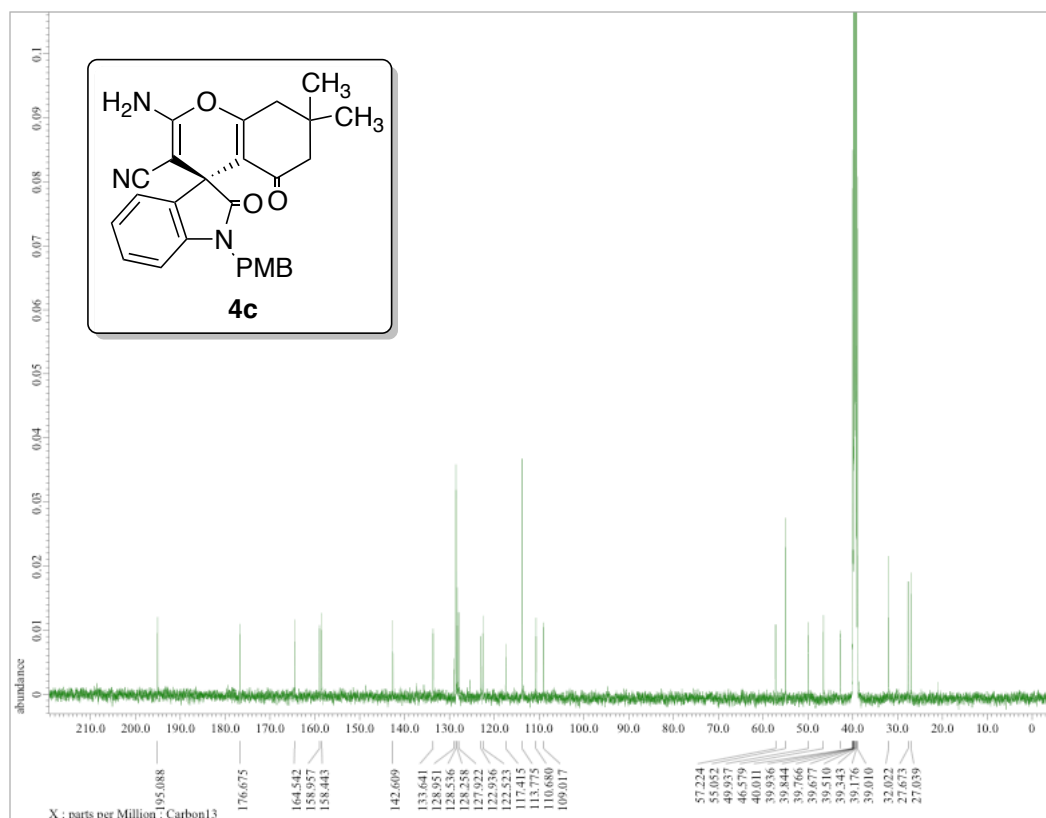

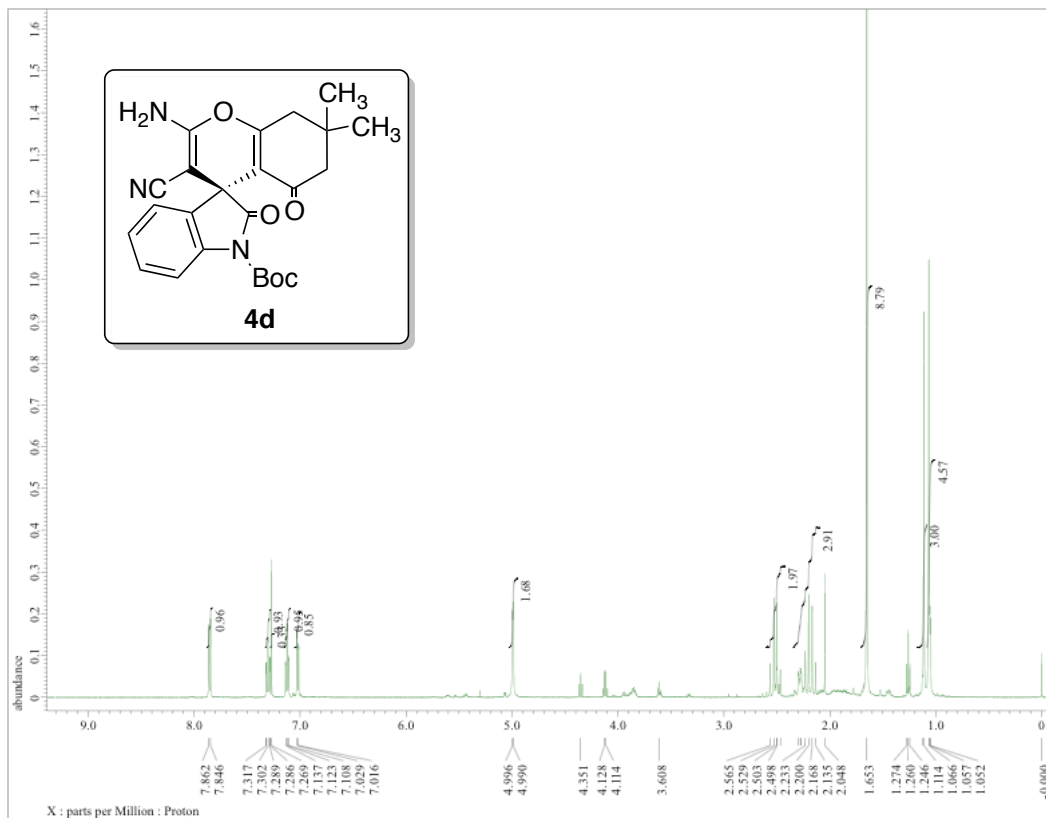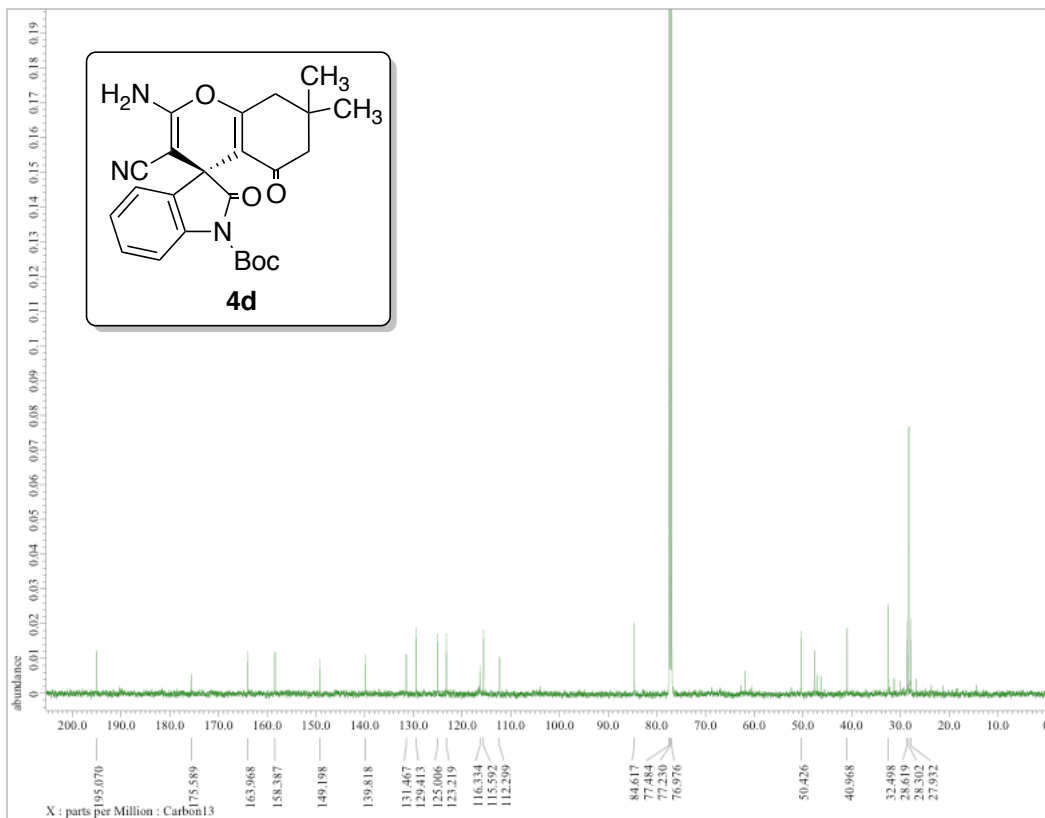

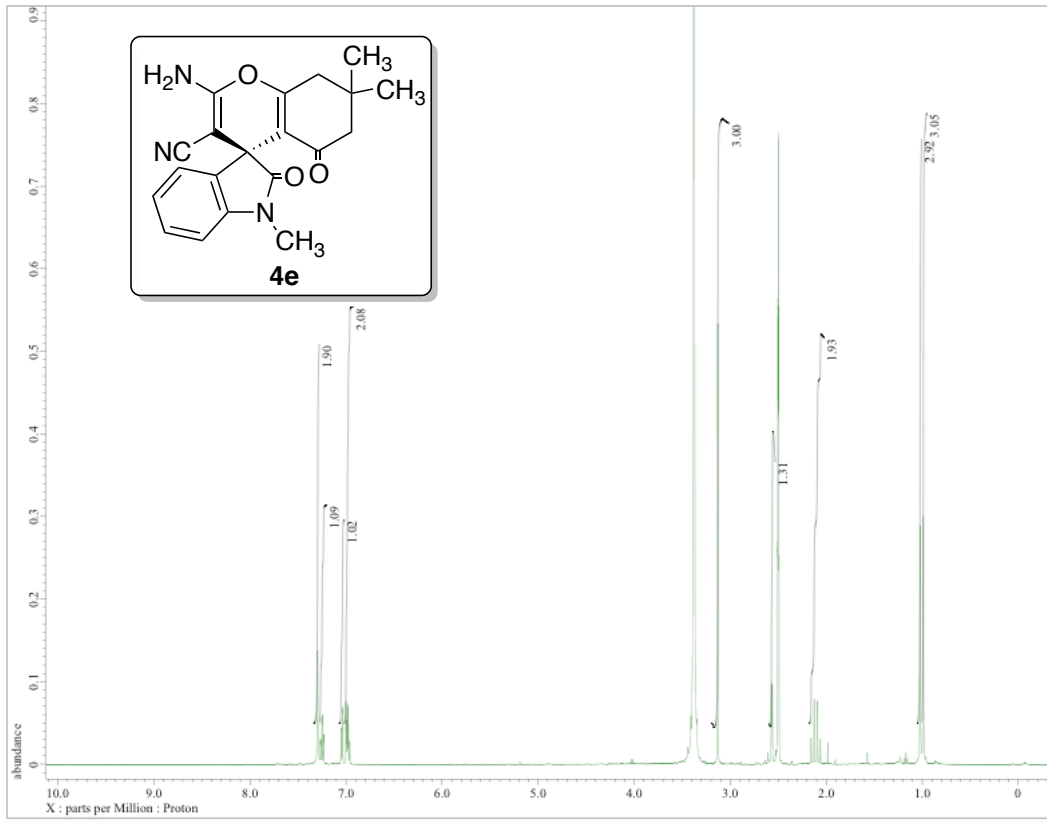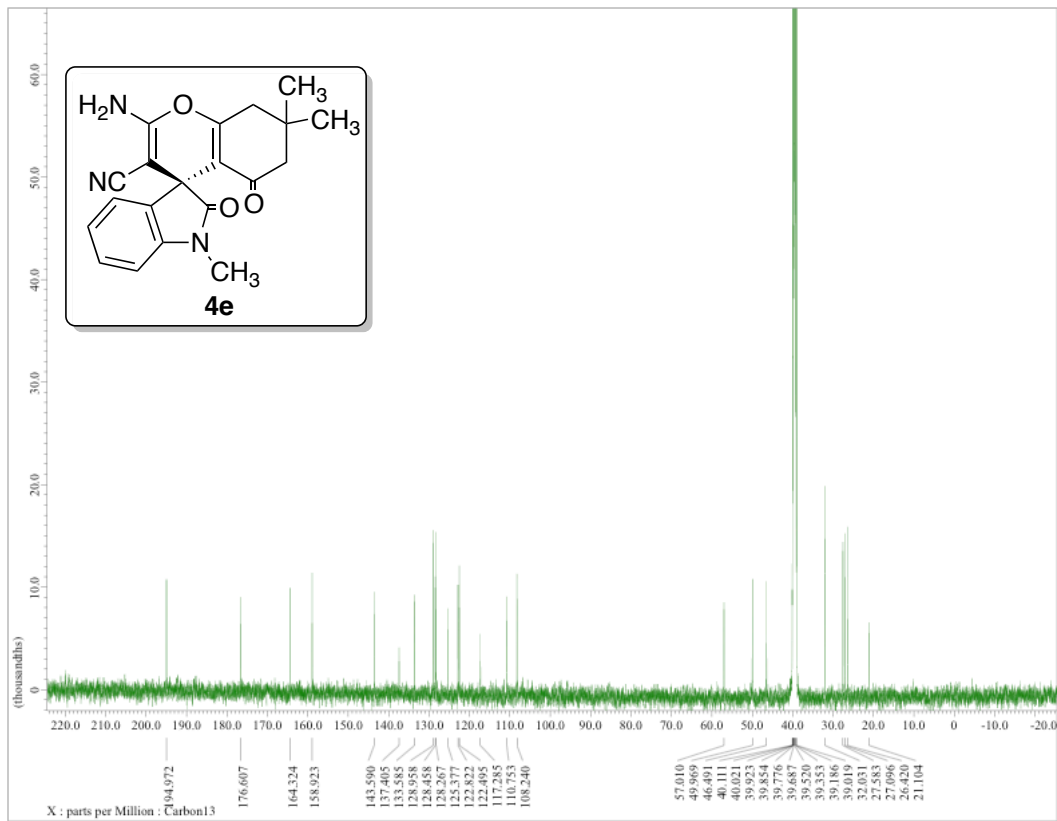

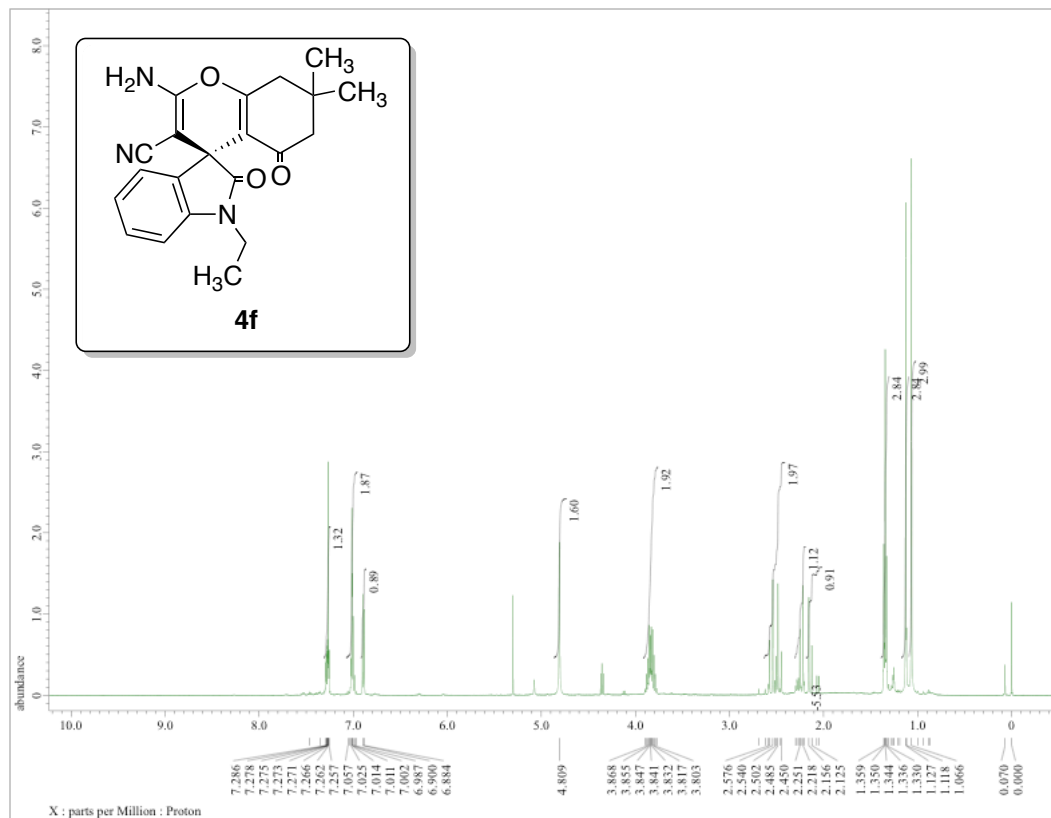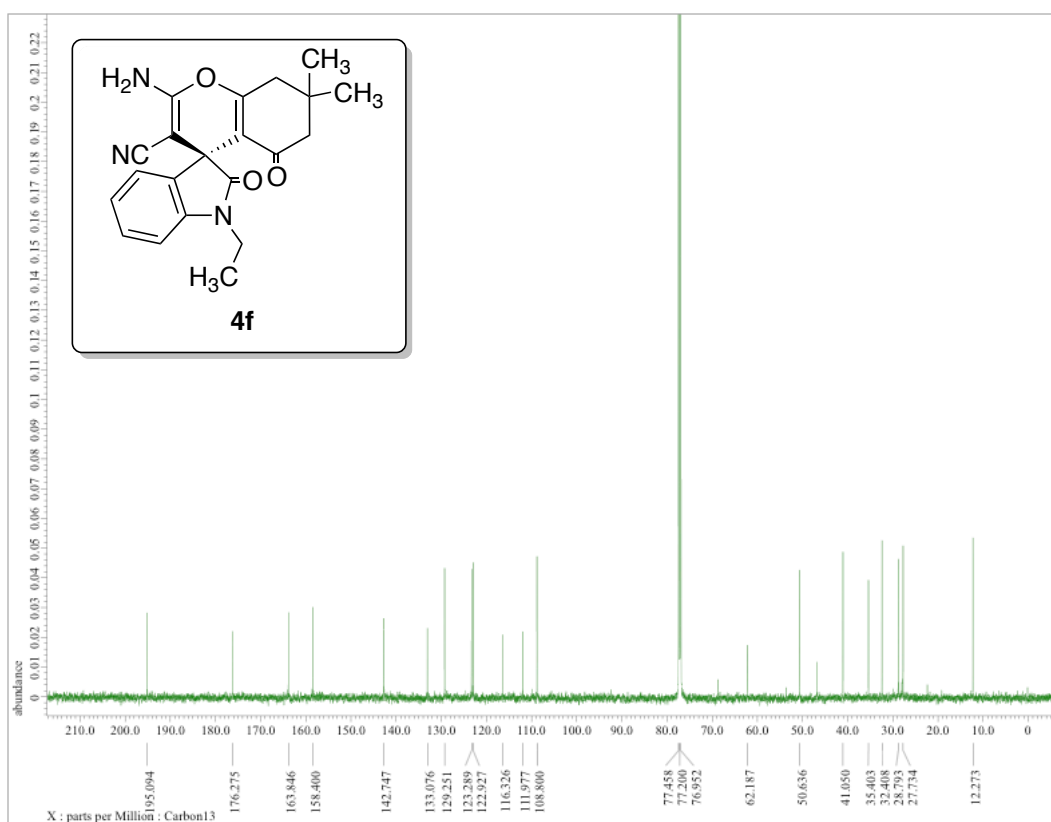



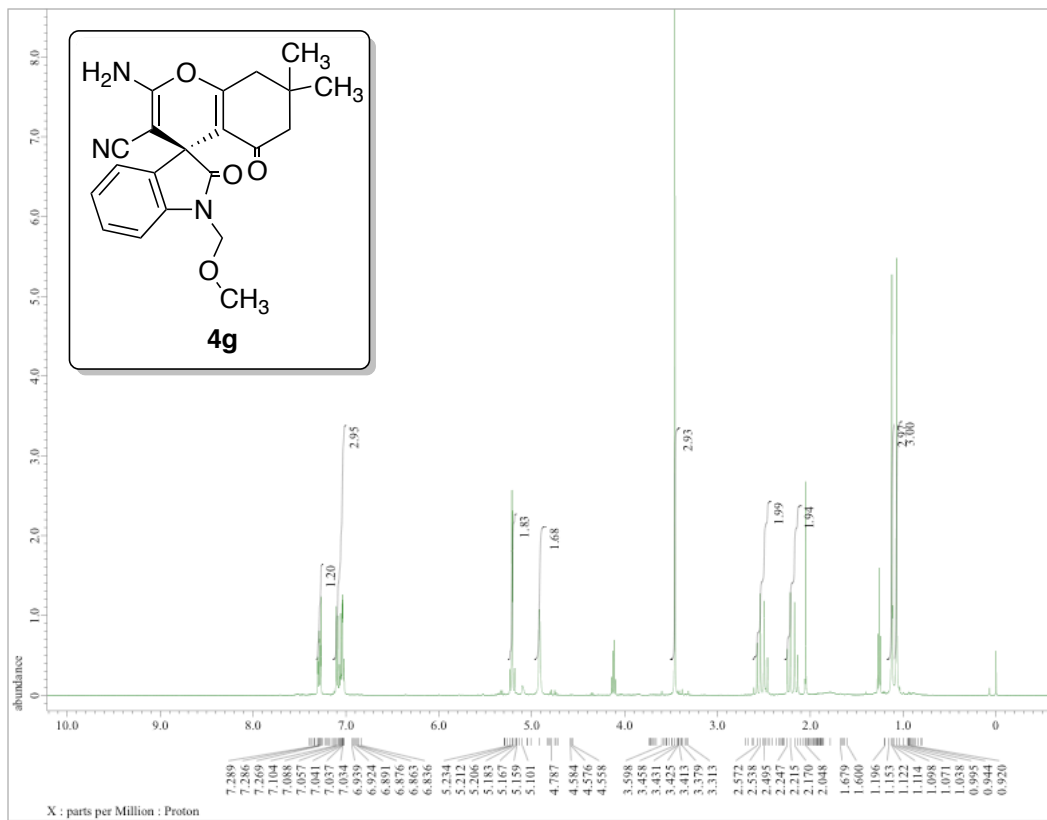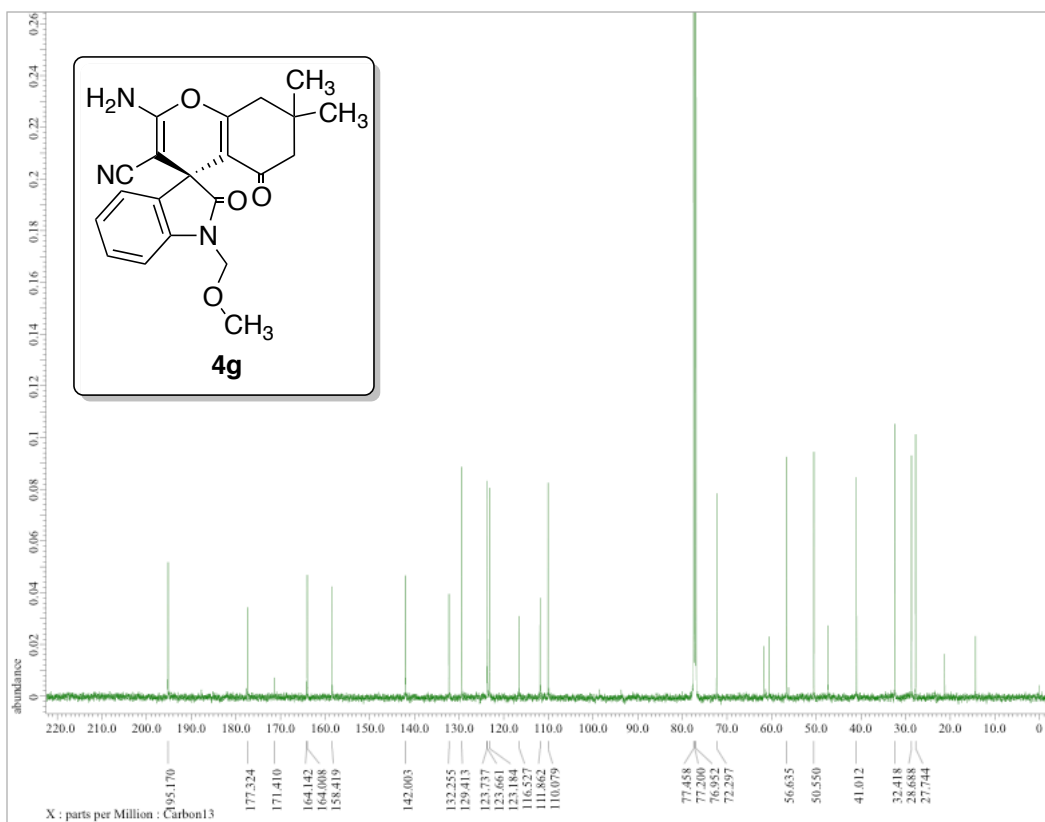

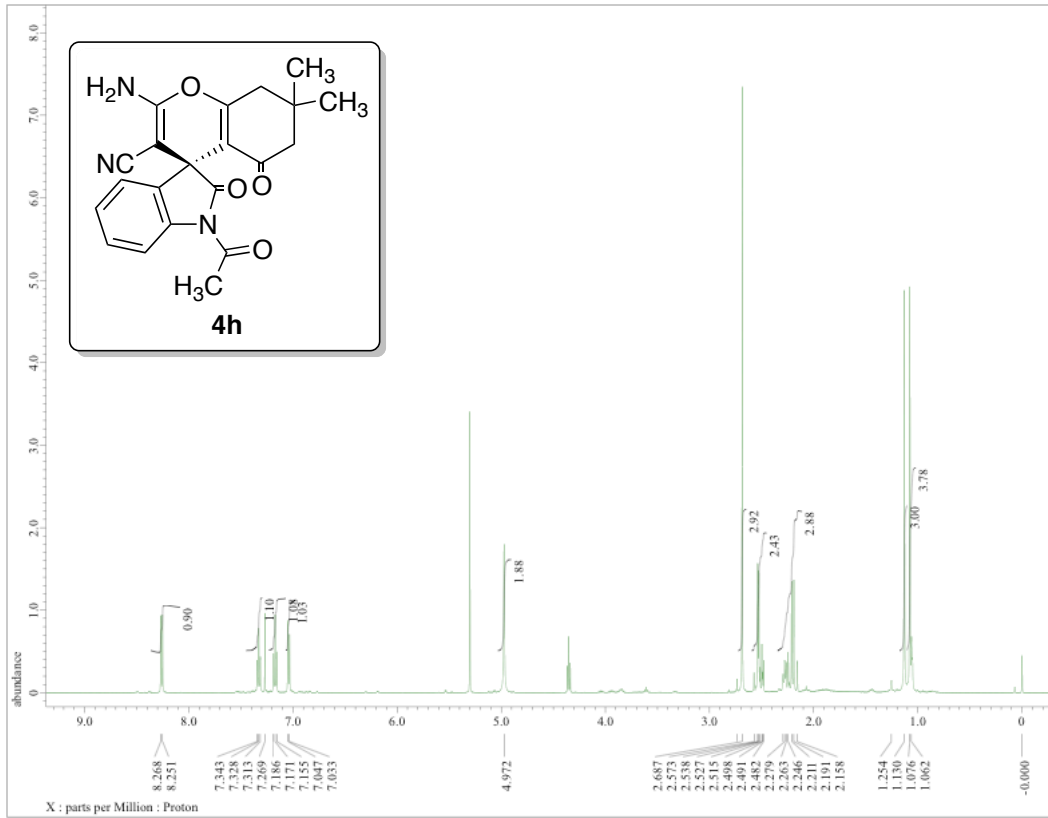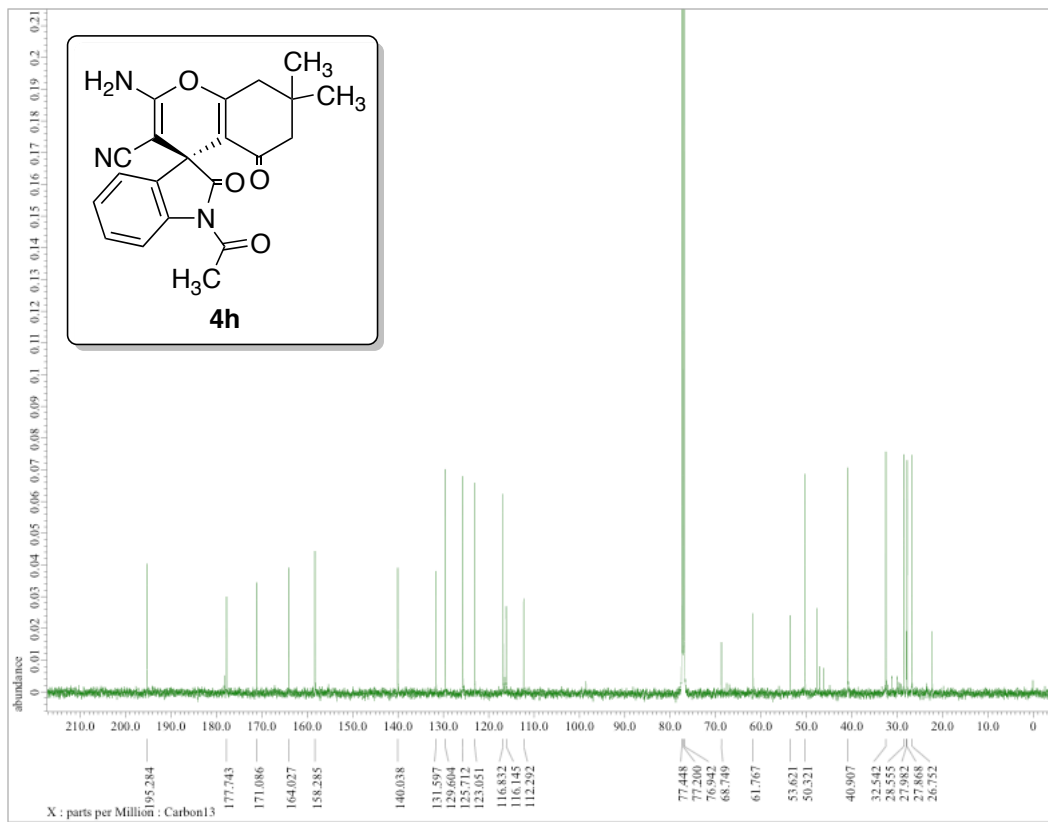

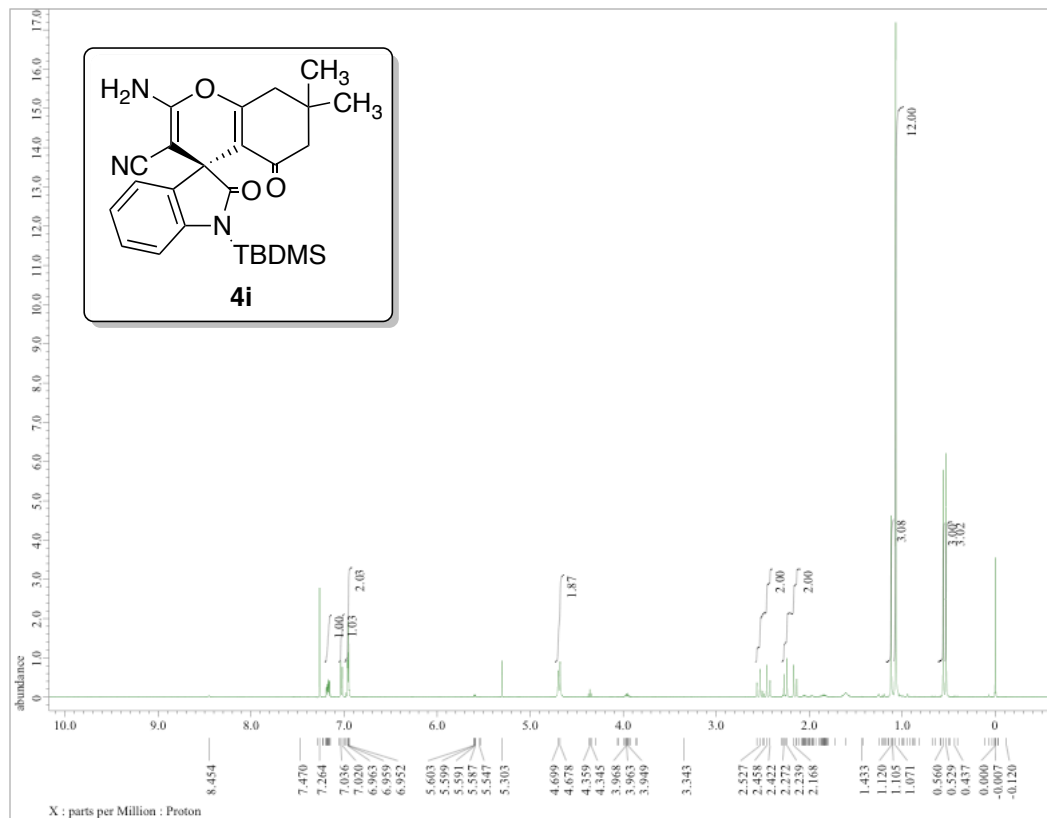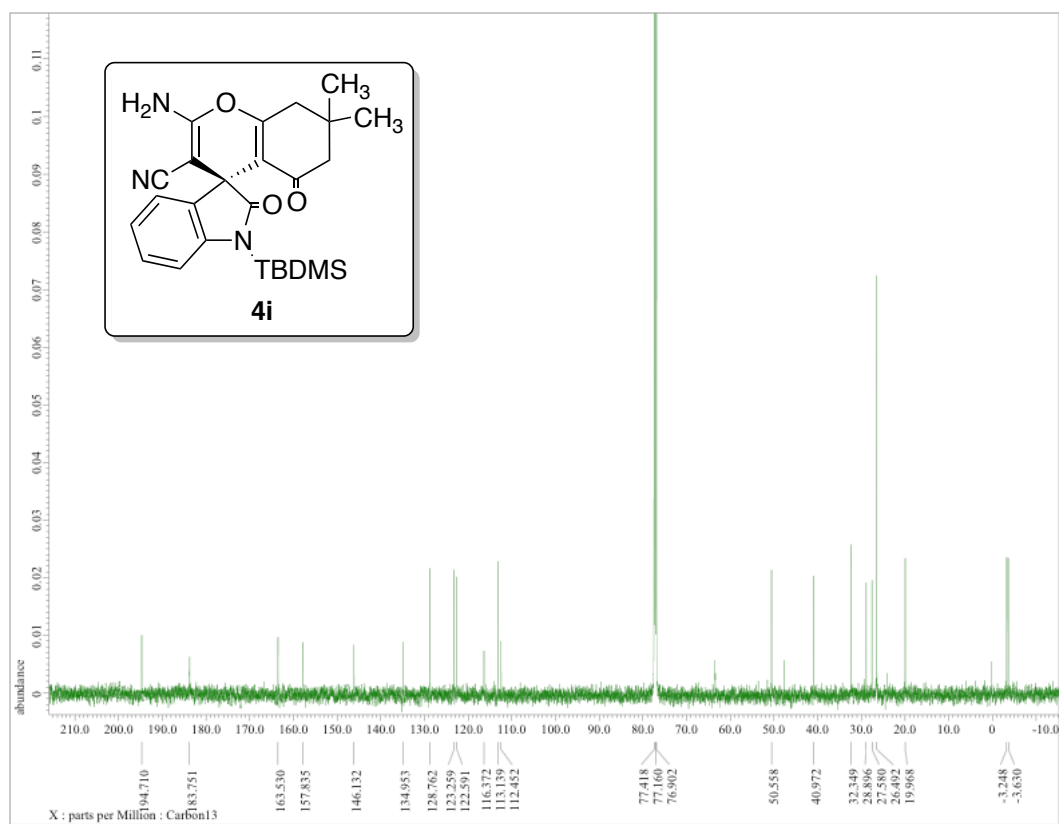

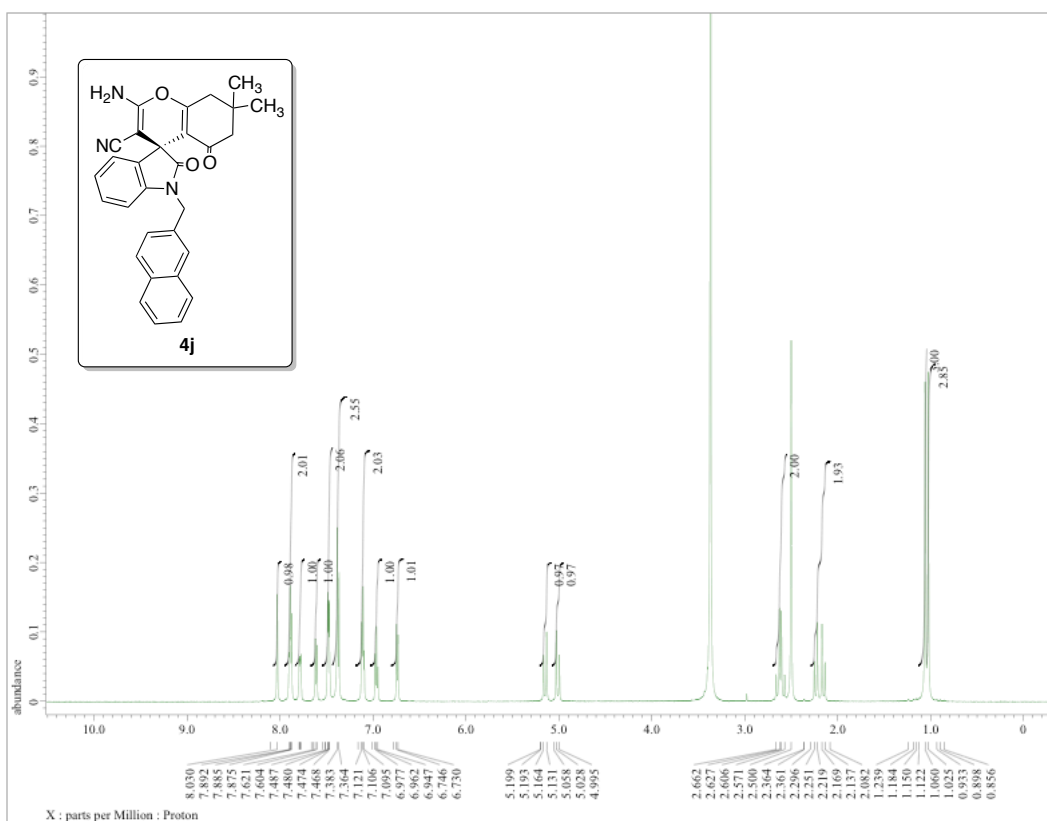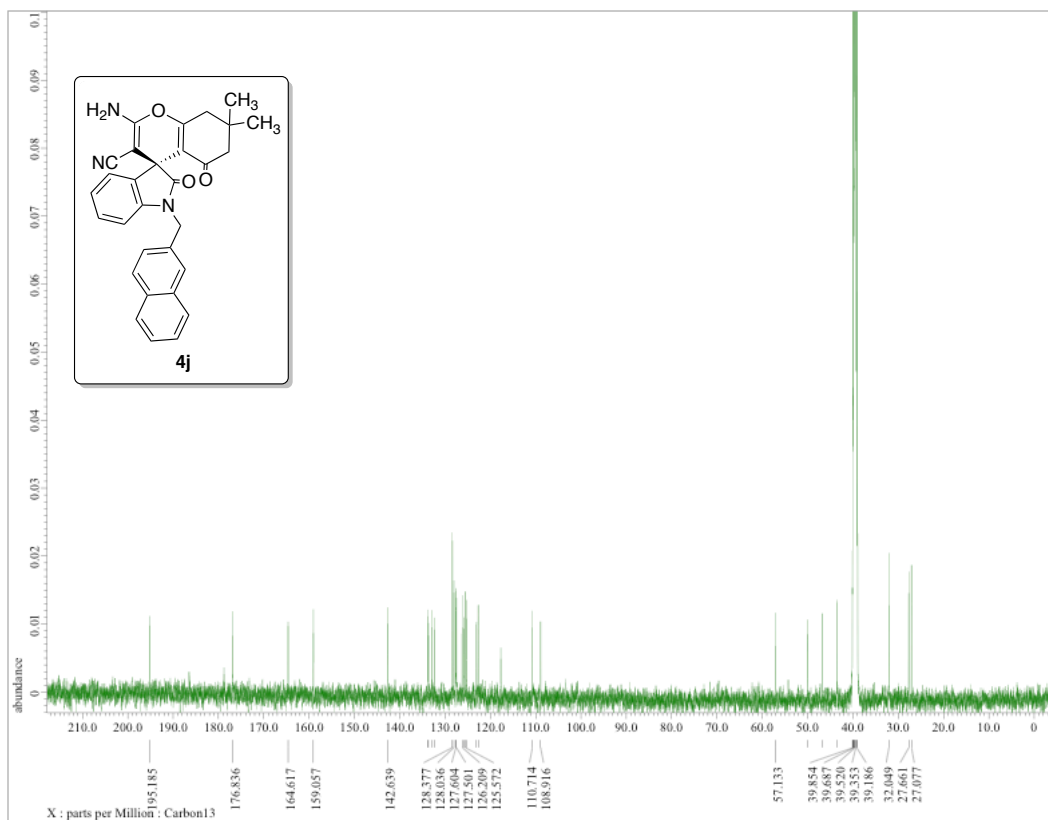

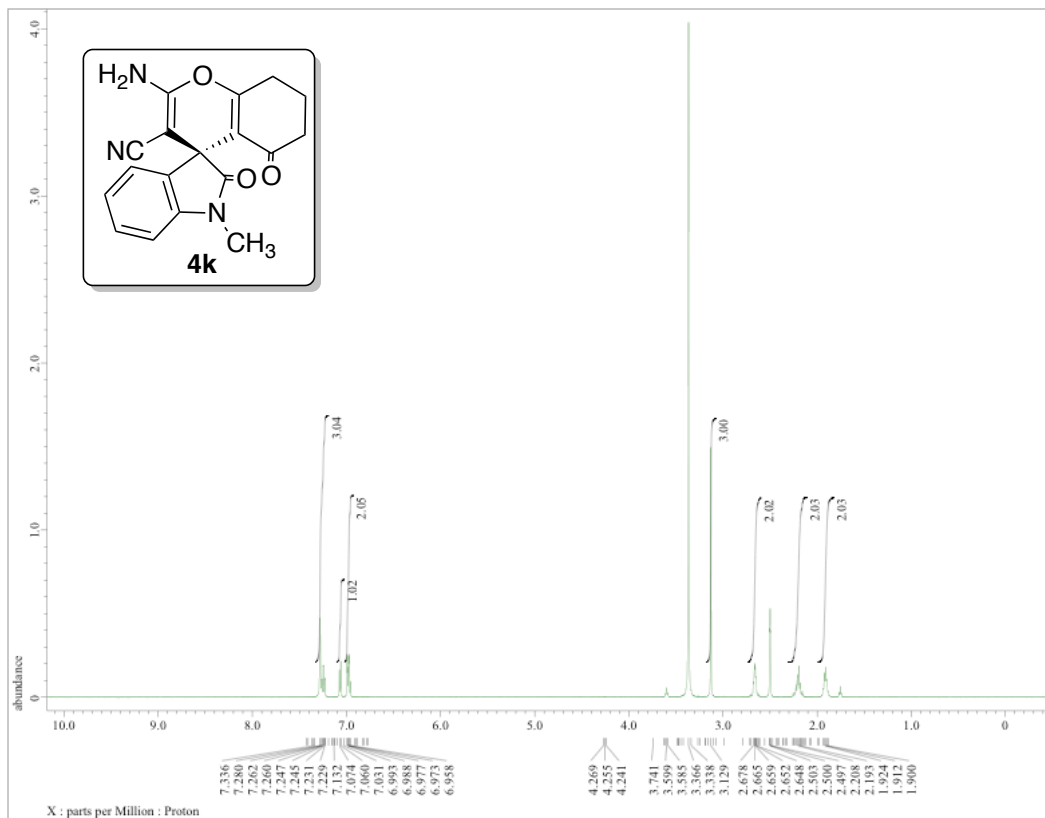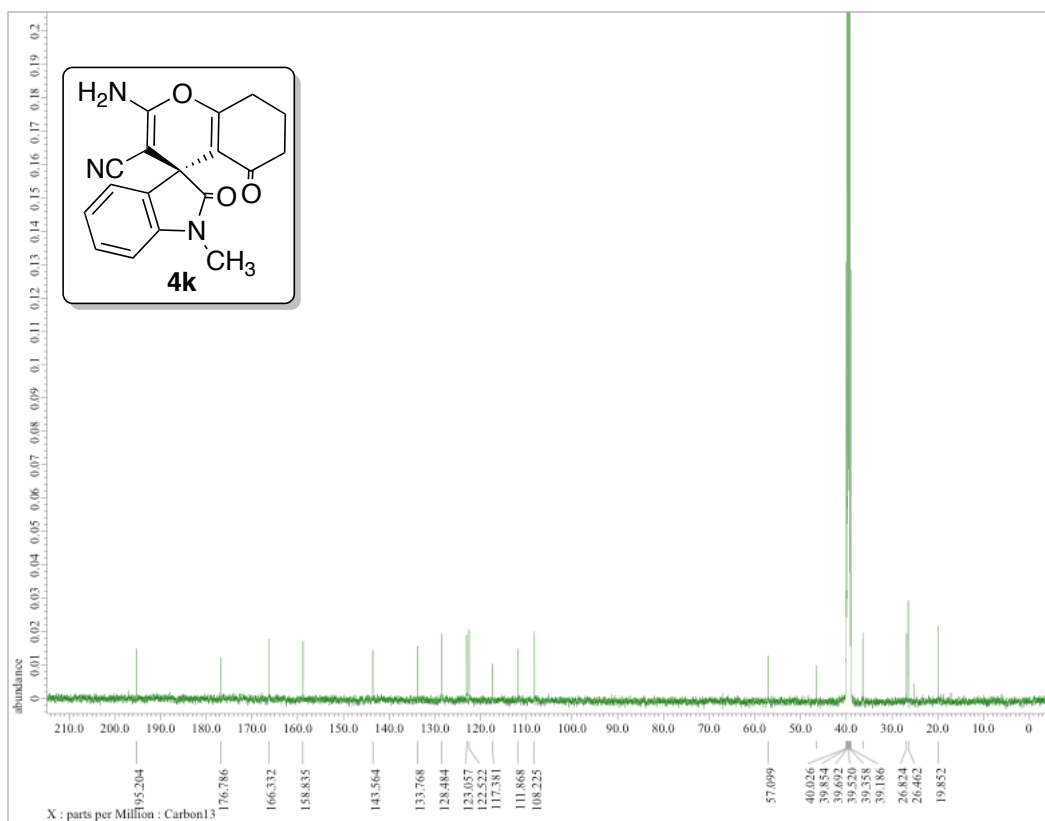

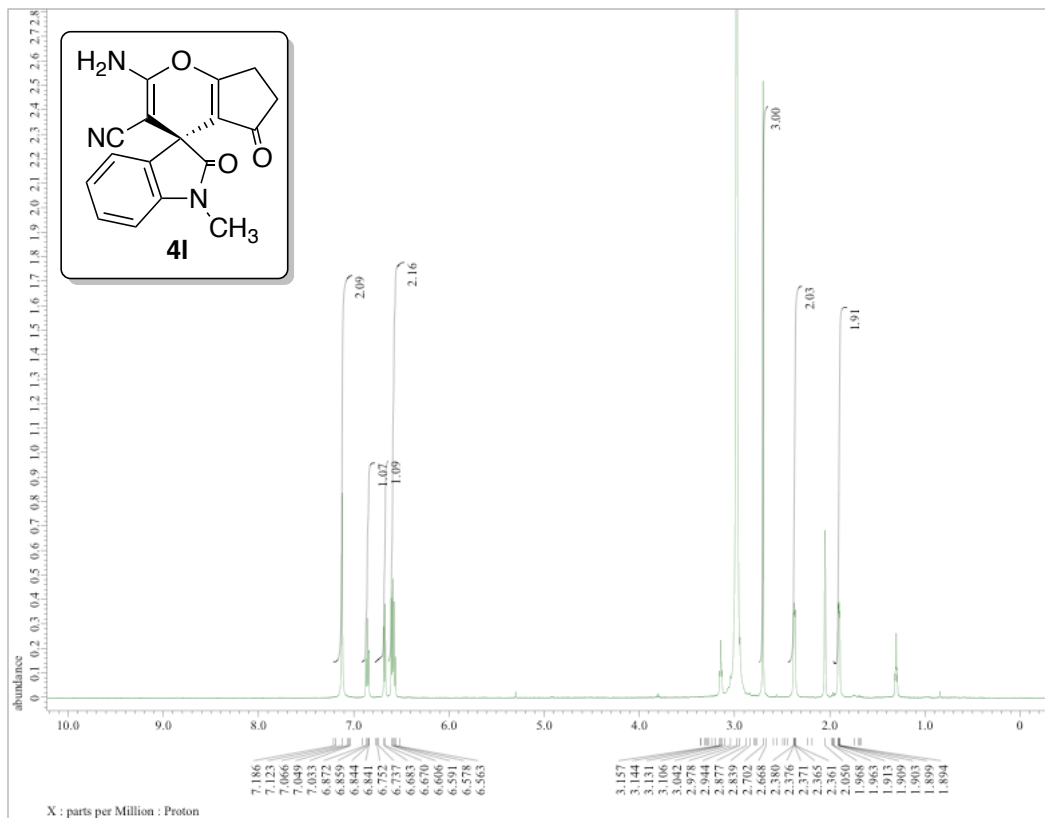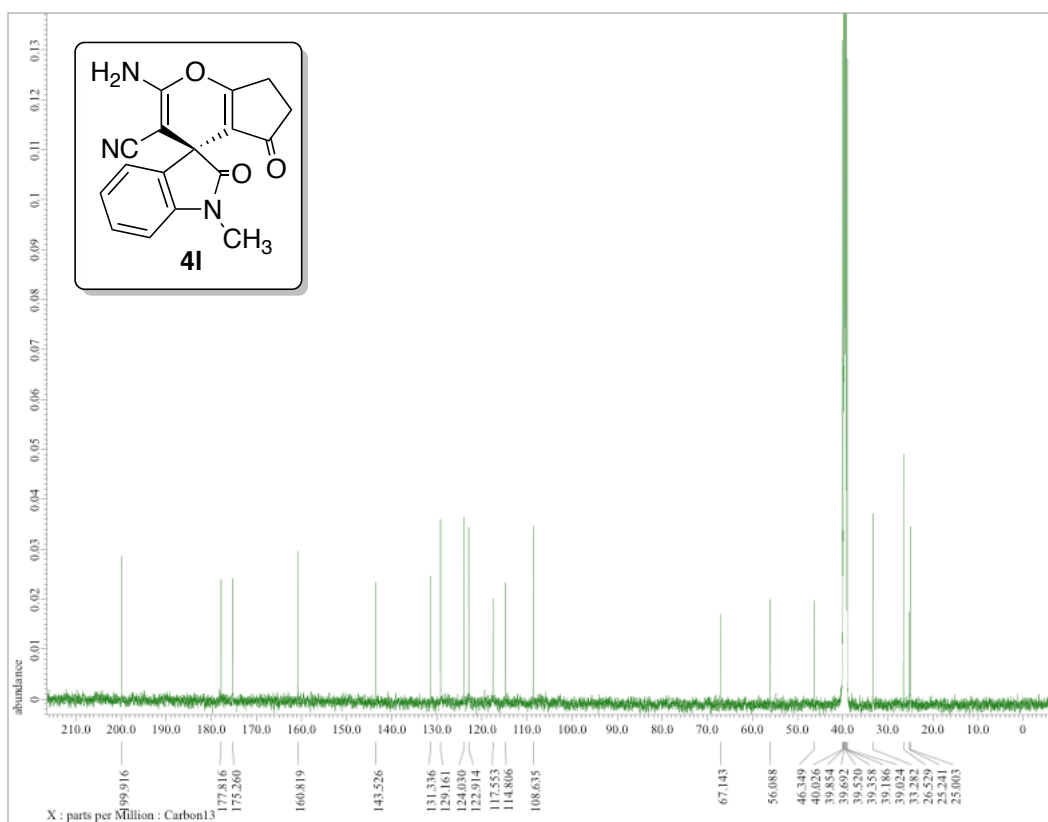



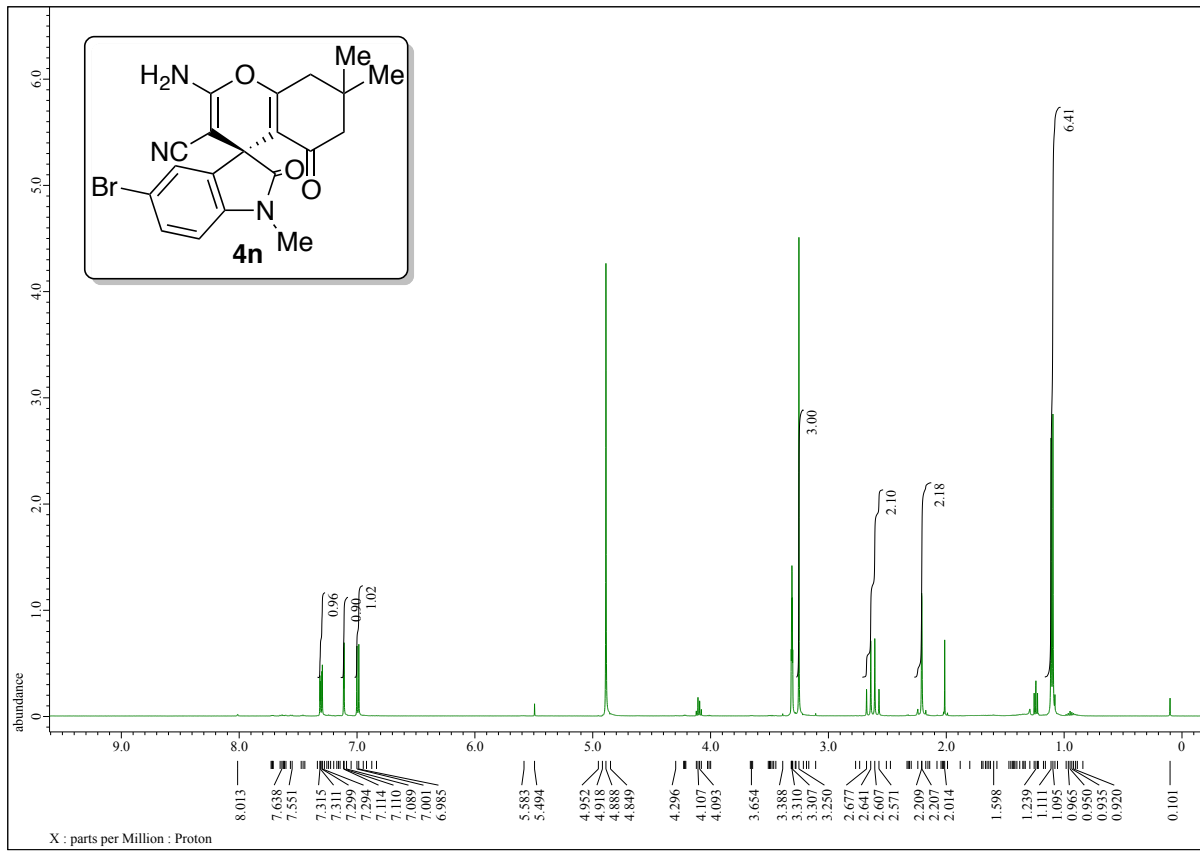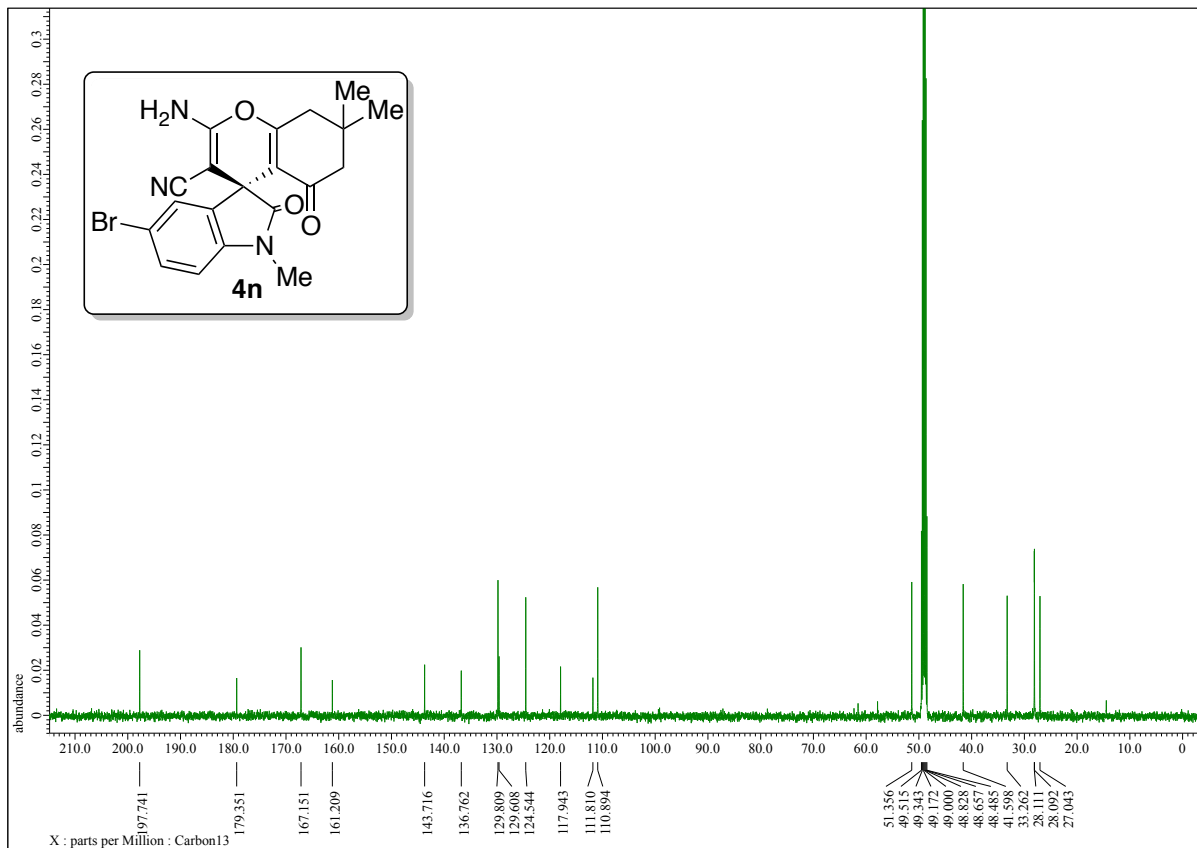



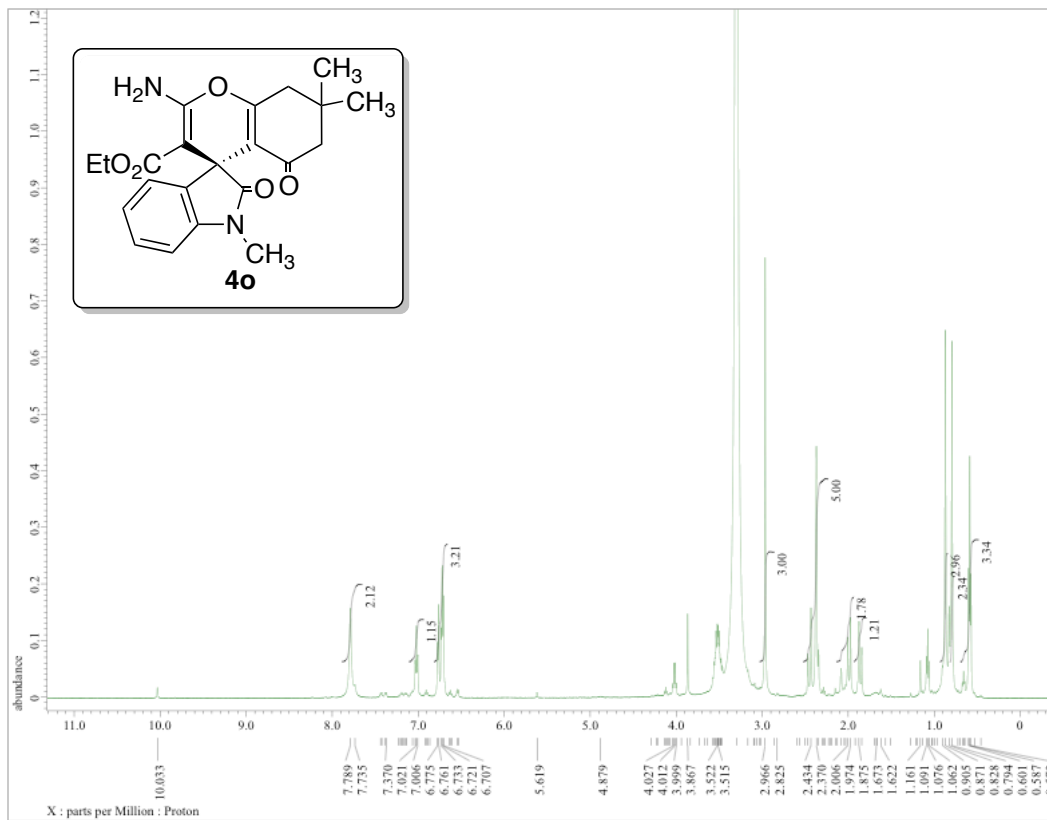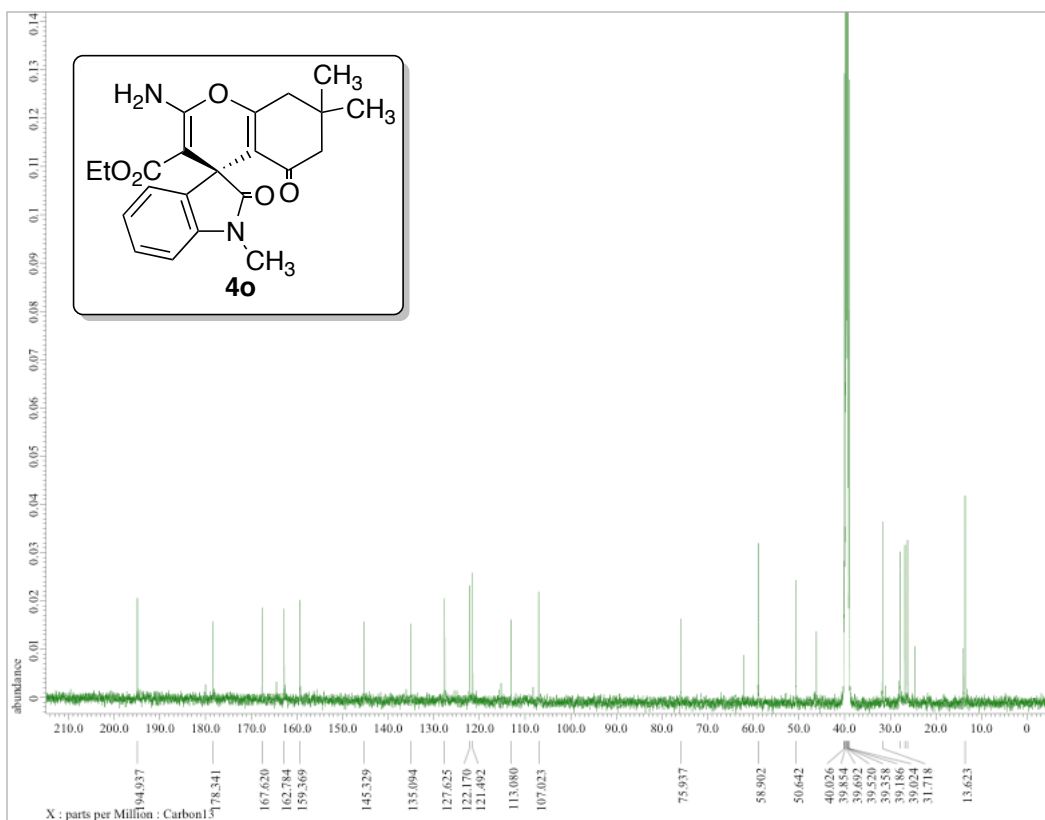

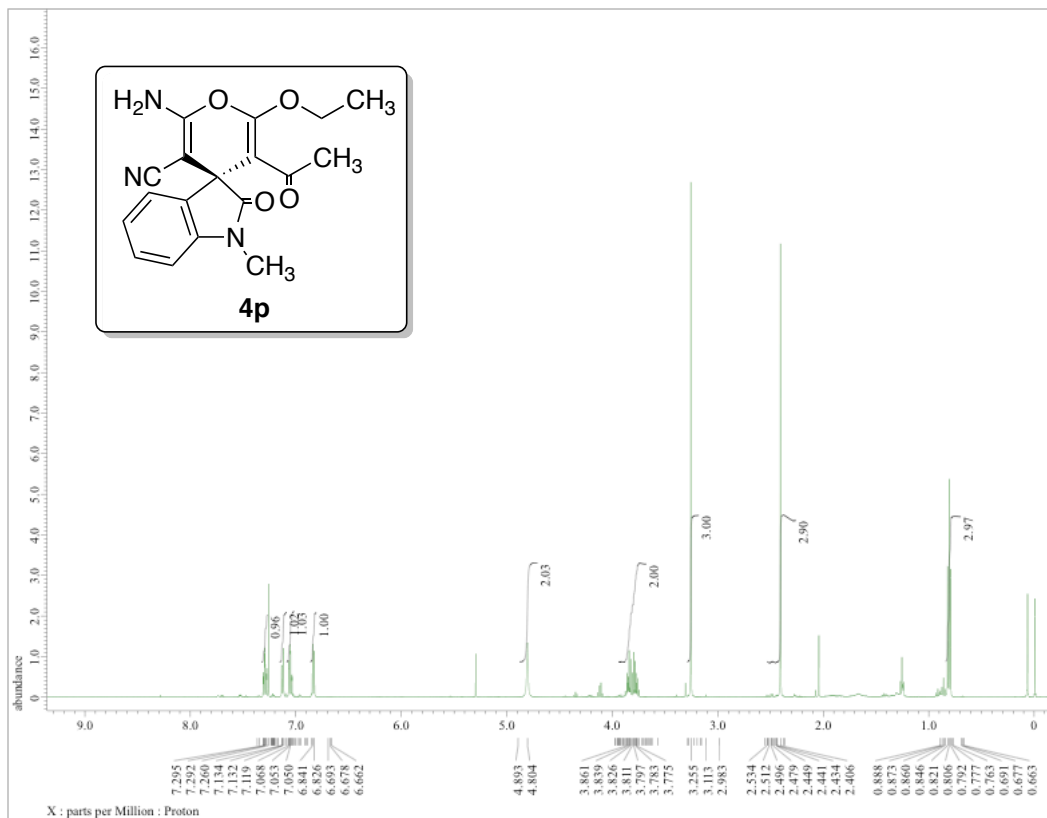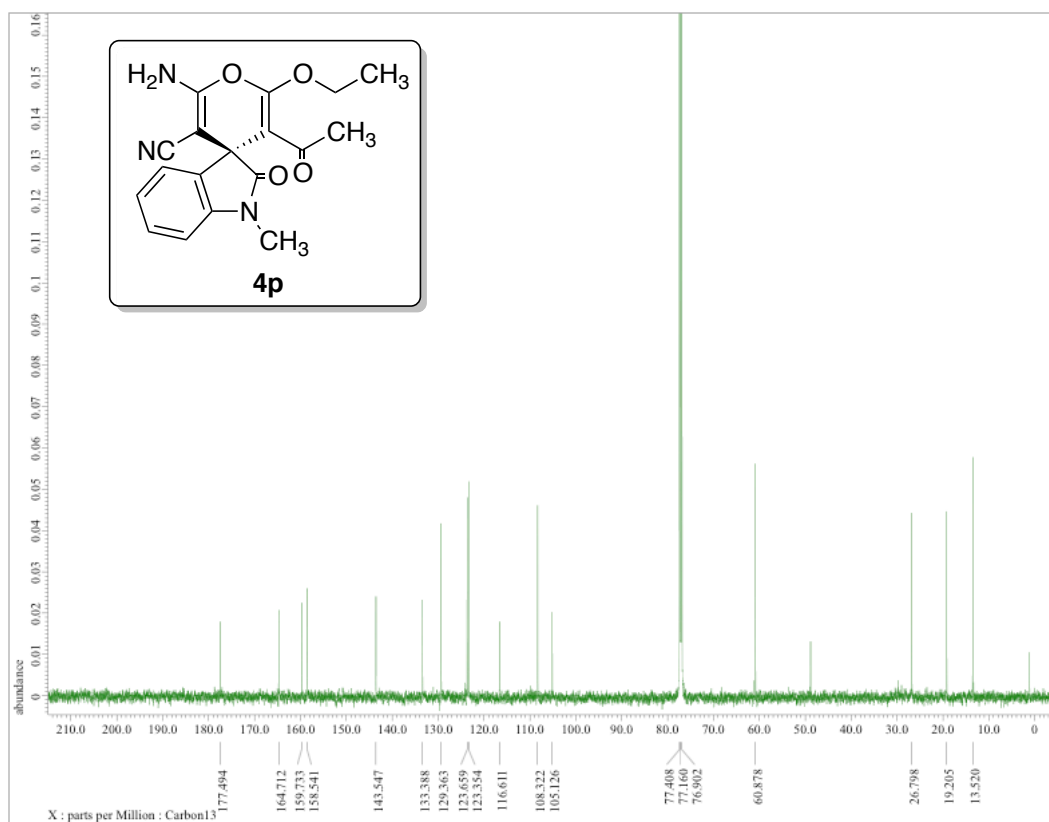

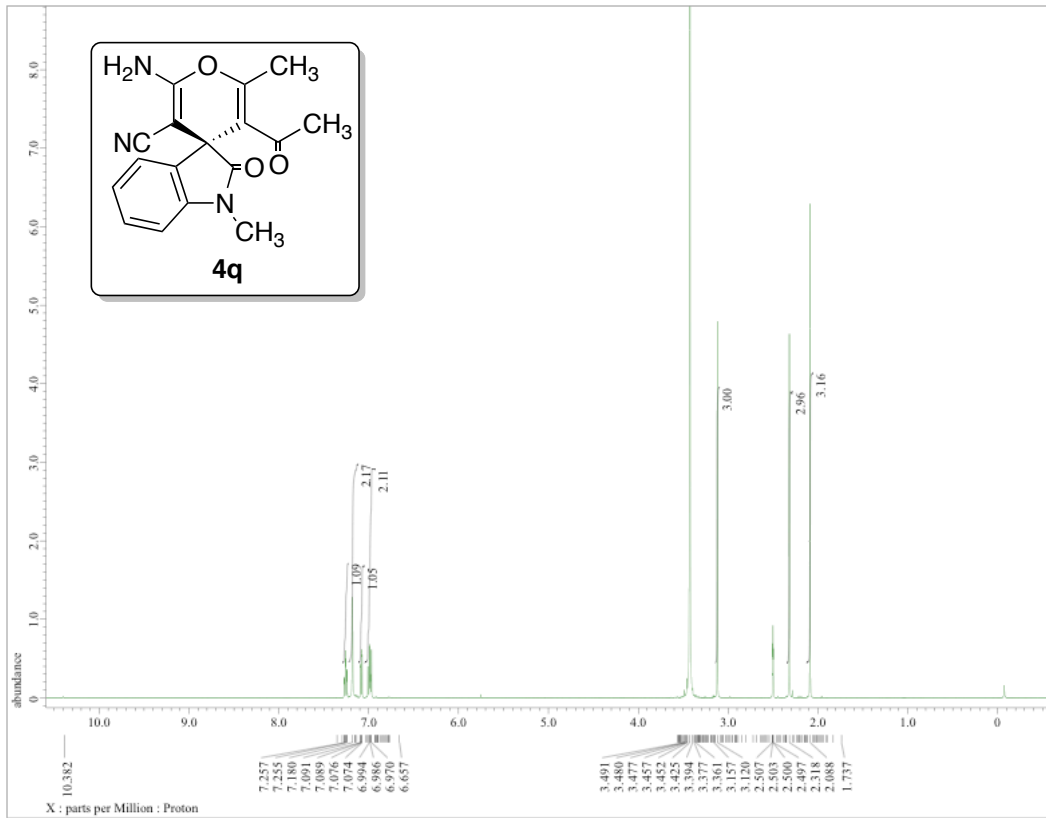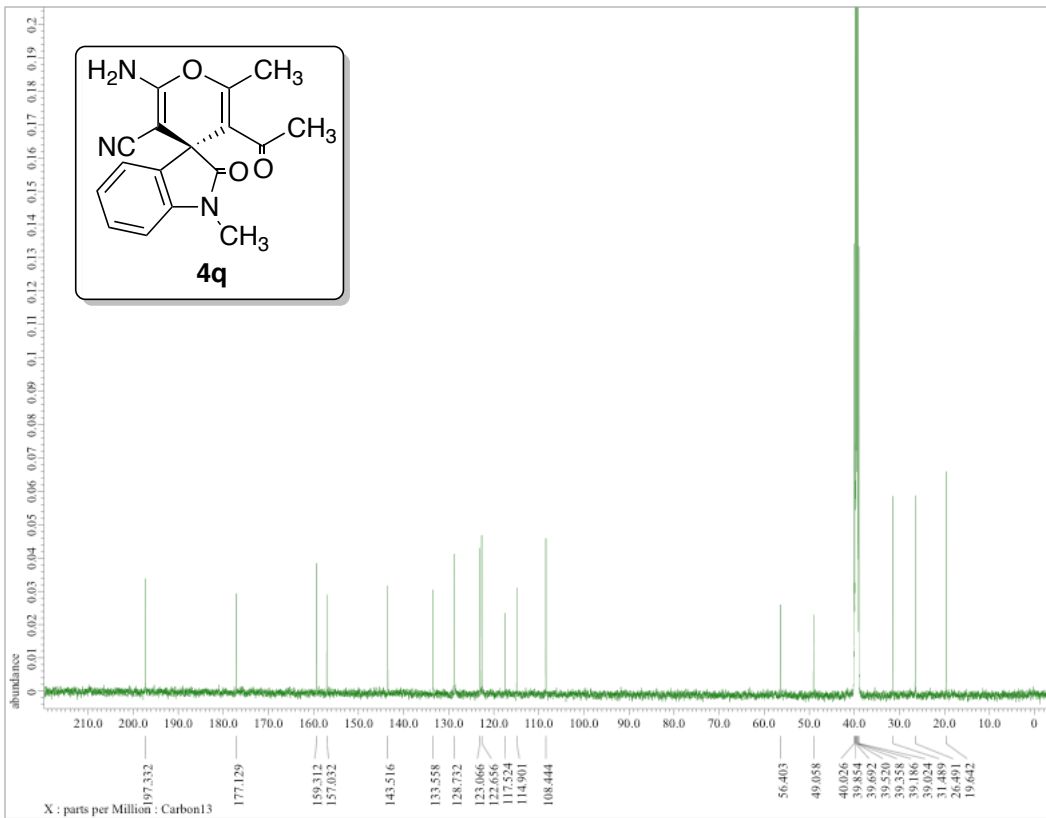

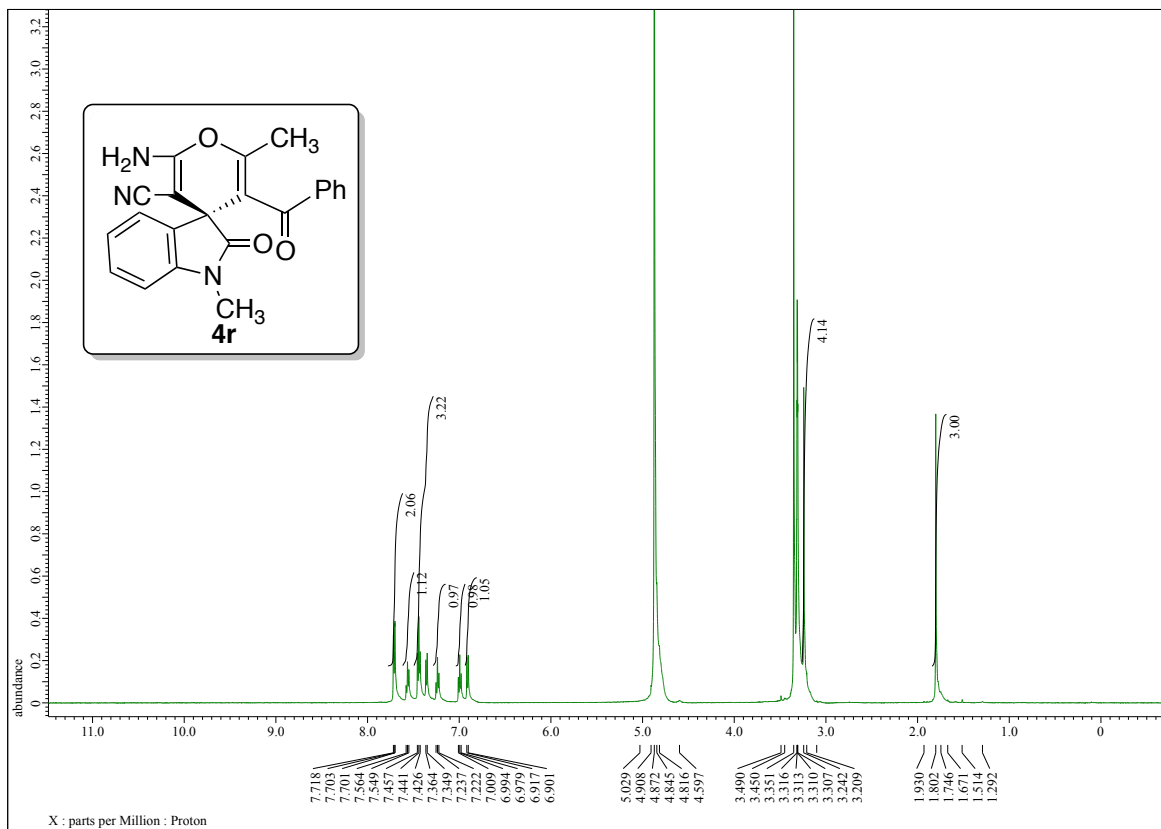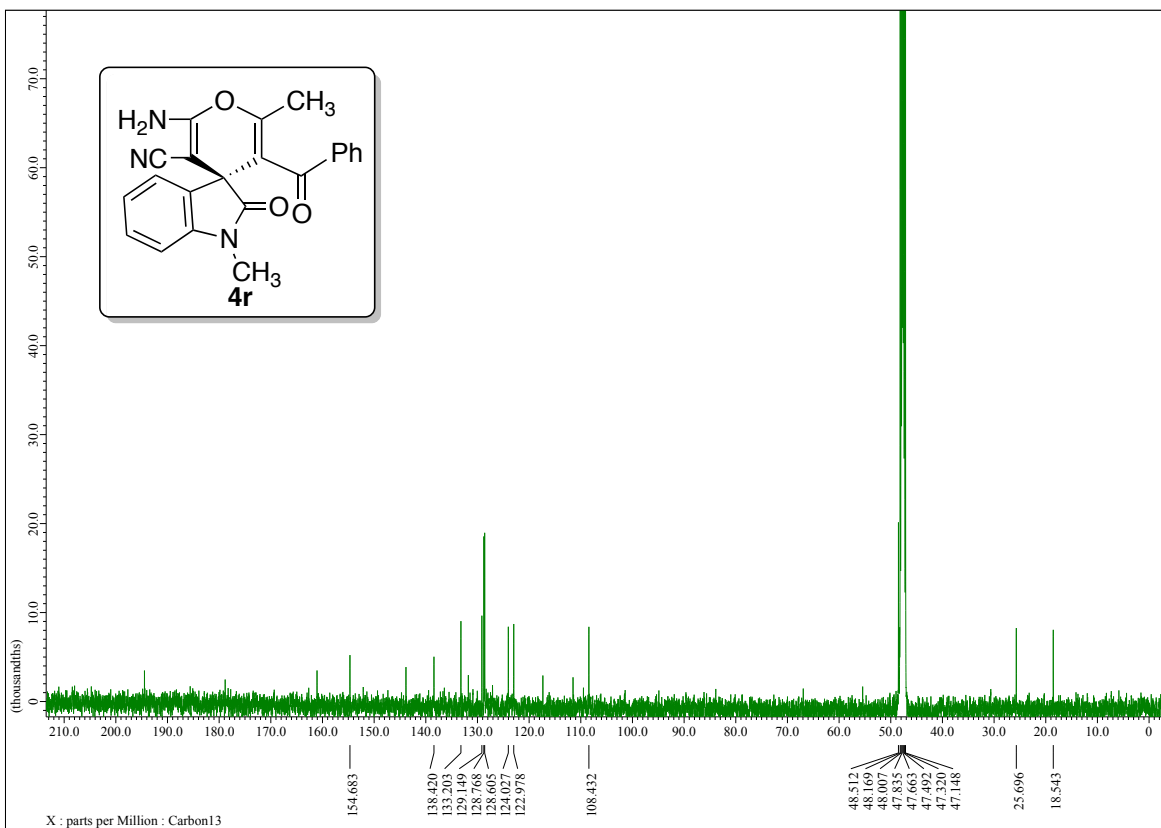

#### 4. X-ray Crystallographic Analysis of **4e**

X-ray diffraction data were collected at 93 K on a Rigaku R-AXIS RAPID diffractometer using multi-layer mirror monochromated Cu-K $\alpha$  radiation. The structure was solved by direct methods<sup>1</sup> and expanded using Fourier techniques. The non-hydrogen atoms were refined anisotropically. Hydrogen atoms were refined using the riding model. The final cycle of full-matrix least-squares refinement<sup>2</sup> on F<sup>2</sup> was based on 2997 observed reflections and 236 variable parameters and converged (largest parameter shift was 0.00 times its esd) with unweighted and weighted agreement factors of:

$$R_1 = \sum ||F_o| - |F_c|| / \sum |F_o| = 0.0409$$
$$wR_2 = [ \sum ( w (F_o^2 - F_c^2)^2 ) / \sum w(F_o^2)^2 ]^{1/2} = 0.1092$$

The goodness of fit<sup>3</sup> was 1.04. Unit weights were used. The maximum and minimum peaks on the final difference Fourier map corresponded to 0.37 and -0.42 e-/Å<sup>3</sup>, respectively. The final Flack parameter<sup>4</sup> was -0.03(5), indicating that the present absolute structure is correct.<sup>5</sup> A total of 9893 reflections were measured and 2997 were unique ( $R_{int} = 0.0361$ ). Crystal data and refinement statistics are shown in Table S1. Atomic coordinates and  $B_{iso}/B_{eq}$  are listed in Table S2. Atomic coordinates and  $B_{iso}$  involving hydrogen atoms are listed in Table S3.

Crystallographic data of **4e** has been deposited with Cambridge Crystallographic Data Center, deposition no. CCDC 1823802.

---

1. Sheldrick, G. M. A Short history of SHELX. *Acta Cryst.* **2008**, *A64*, 112-122.

2. Least Squares function minimized: (SHELXL 2013)

$$\sum w(F_o^2 - F_c^2)^2 \quad \text{where } w = \text{Least Squares weights.}$$

3. Goodness of fit is defined as:

$$[\sum w(F_o^2 - F_c^2)^2 / (N_o - N_v)]^{1/2}$$

where:  $N_o$  = number of observations

$N_v$  = number of variables

4. Parsons, S.; Flack, H. Precise absolute-structure determination in light-atom crystals. *Acta Cryst.* **2004**, *A60*, s61.

5. Flack, H.D.; Bernardinelli, G. Reporting and evaluating absolute-structure and absolute-configuration determinations. *J. Appl. Cryst.* **2000**, *33*, 1143-1148.

**Table S1.** Crystal data and structure refinement.

---

| A. Crystal Data      |                                                                                                             |
|----------------------|-------------------------------------------------------------------------------------------------------------|
| Empirical Formula    | C <sub>20</sub> H <sub>19</sub> N <sub>3</sub> O <sub>3</sub>                                               |
| Formula Weight       | 349.39                                                                                                      |
| Crystal Color, Habit | colorless, platelet                                                                                         |
| Crystal Dimensions   | 0.100 X 0.100 X 0.100 mm                                                                                    |
| Crystal System       | monoclinic                                                                                                  |
| Lattice Type         | Primitive                                                                                                   |
| Lattice Parameters   | a = 6.79795(18) Å<br>b = 9.9618(3) Å<br>c = 12.8161(4) Å<br>b = 98.897(7) °<br>V = 857.46(4) Å <sup>3</sup> |

|                         |                         |
|-------------------------|-------------------------|
| Space Group             | $P_{21}$ (#4)           |
| Z value                 | 2                       |
| Dcalc                   | 1.353 g/cm <sup>3</sup> |
| F000                    | 368.00                  |
| $\mu(\text{CuK}\alpha)$ | 7.573 cm <sup>-1</sup>  |

#### B. Intensity Measurements

|                             |                                                                                                                              |
|-----------------------------|------------------------------------------------------------------------------------------------------------------------------|
| Diffractometer              | R-AXIS RAPID                                                                                                                 |
| Radiation                   | CuK $\alpha$ ( $\lambda = 1.54187 \text{ \AA}$ )<br>multi-layer mirror monochromated                                         |
| Voltage, Current            | 40kV, 30mA                                                                                                                   |
| Temperature                 | -183.0oC                                                                                                                     |
| Detector Aperture           | 460.0 x 256.0 mm                                                                                                             |
| No. of Reflections Measured | Total: 9893<br>Unique: 2997 ( $R_{\text{int}} = 0.0361$ )<br>Parsons quotients (Flack x parameter):<br>1351                  |
| Corrections                 | Lorentz-polarization<br>Absorption<br>(trans. factors: 0.721 - 0.927)<br>Secondary Extinction<br>(coefficient: 1.07500e-002) |

#### C. Structure Solution and Refinement

|                                             |                                                                                                                      |
|---------------------------------------------|----------------------------------------------------------------------------------------------------------------------|
| Structure Solution                          | Direct Methods (SHELXS)                                                                                              |
| Refinement                                  | Full-matrix least-squares on $F^2$                                                                                   |
| Function Minimized                          | $\Sigma w (F_o^2 - F_c^2)^2$                                                                                         |
| Least Squares Weights                       | $w = 1 / [ \sigma^2(F_o^2) + (0.0773 \cdot P)^2 + 0.3462 \cdot P ]$<br>where $P = (\text{Max}(F_o^2, 0) + 2F_c^2)/3$ |
| 2 $\sigma$ max cutoff                       | 135.0o                                                                                                               |
| Anomalous Dispersion                        | All non-hydrogen atoms                                                                                               |
| No. Observations (All reflections)          | 2997                                                                                                                 |
| No. Variables                               | 236                                                                                                                  |
| Reflection/Parameter Ratio                  | 12.70                                                                                                                |
| Residuals: $R_1$ ( $I > 2.00\sigma(I)$ )    | 0.0409                                                                                                               |
| Residuals: $R$ (All reflections)            | 0.0410                                                                                                               |
| Residuals: $wR_2$ (All reflections)         | 0.1092                                                                                                               |
| Goodness of Fit Indicator                   | 1.036                                                                                                                |
| Flack parameter (Parsons' quotients = 1351) | -0.03(5)                                                                                                             |
| Max Shift/Error in Final Cycle              | 0.000                                                                                                                |
| Maximum peak in Final Diff. Map             | 0.37 e-/Å <sup>3</sup>                                                                                               |
| Minimum peak in Final Diff. Map             | -0.42 e-/Å <sup>3</sup>                                                                                              |

**Table S2.** Atomic coordinates and  $B_{\text{iso}}/B_{\text{eq}}$

| atom | x          | y           | z           | B <sub>eq</sub> |
|------|------------|-------------|-------------|-----------------|
| O3   | 0.5887(3)  | 0.1280(2)   | 0.33069(15) | 1.36(3)         |
| O5   | 0.6485(3)  | 0.3916(2)   | 0.19882(16) | 1.60(4)         |
| O27  | 0.1154(3)  | 0.43951(19) | 0.39244(14) | 1.14(3)         |
| N1   | -0.0838(4) | 0.2802(3)   | 0.44067(19) | 1.35(4)         |
| N6   | 0.4631(3)  | 0.1157(2)   | 0.15315(18) | 1.21(4)         |
| N12  | 0.0859(4)  | -0.0328(3)  | 0.3494(2)   | 1.98(5)         |
| C2   | 0.3834(4)  | 0.4002(3)   | 0.2967(2)   | 0.96(4)         |
| C7   | 0.3462(4)  | 0.6173(3)   | 0.3942(2)   | 1.16(4)         |
| C8   | 0.1136(4)  | 0.0798(3)   | 0.3371(2)   | 1.34(5)         |
| C9   | 0.3890(4)  | 0.7272(3)   | 0.2224(2)   | 1.39(5)         |
| C10  | 0.3133(4)  | 0.1812(3)   | 0.0832(2)   | 1.21(4)         |
| C11  | 0.2643(4)  | 0.1629(3)   | -0.0252(2)  | 1.42(5)         |
| C13  | 0.1086(4)  | 0.2414(3)   | -0.0771(2)  | 1.65(5)         |
| C14  | 0.0051(4)  | 0.3319(3)   | -0.0231(2)  | 1.54(5)         |
| C15  | 0.6559(4)  | 0.5774(3)   | 0.3182(2)   | 1.23(5)         |
| C16  | 0.4954(4)  | 0.6818(3)   | 0.3311(2)   | 1.14(4)         |
| C17  | 0.2990(4)  | 0.2655(3)   | 0.2548(2)   | 1.07(5)         |
| C18  | 0.1530(4)  | 0.2190(3)   | 0.3262(2)   | 1.12(4)         |
| C19  | 0.6228(5)  | 0.0374(3)   | 0.1190(3)   | 1.70(5)         |
| C20  | 0.5901(4)  | 0.8033(3)   | 0.3922(2)   | 1.46(5)         |
| C21  | 0.2109(4)  | 0.2705(3)   | 0.1383(2)   | 1.10(5)         |
| C22  | 0.4698(4)  | 0.1624(3)   | 0.2539(2)   | 1.10(4)         |
| C23  | 0.2869(4)  | 0.4782(3)   | 0.3574(2)   | 1.05(4)         |
| C24  | 0.5688(4)  | 0.4509(3)   | 0.2645(2)   | 1.16(4)         |
| C25  | 0.0560(4)  | 0.3468(3)   | 0.0867(2)   | 1.37(5)         |
| C26  | 0.0606(4)  | 0.3070(3)   | 0.3835(2)   | 1.08(4)         |

$$B_{eq} = 8/3 \pi^2 (U_{11}(aa^*)^2 + U_{22}(bb^*)^2 + U_{33}(cc^*)^2 + 2U_{12}(aa^*bb^*)\cos \gamma + 2U_{13}(aa^*cc^*)\cos \beta + 2U_{23}(bb^*cc^*)\cos \alpha)$$

**Table S3.** Atomic coordinates and B<sub>iso</sub> involving hydrogen atoms.

| atom | x        | y        | z        | B <sub>iso</sub> |
|------|----------|----------|----------|------------------|
| H1A  | -0.12861 | 0.19765  | 0.44383  | 1.620            |
| H1B  | -0.13378 | 0.34509  | 0.47508  | 1.620            |
| H7A  | 0.40578  | 0.61390  | 0.46970  | 1.386            |
| H7B  | 0.22556  | 0.67422  | 0.38811  | 1.386            |
| H9A  | 0.48566  | 0.76826  | 0.18283  | 1.673            |
| H9B  | 0.28576  | 0.79290  | 0.23164  | 1.673            |
| H9C  | 0.32757  | 0.64935  | 0.18347  | 1.673            |
| H11  | 0.33314  | 0.10023  | -0.06218 | 1.698            |
| H13  | 0.07255  | 0.23275  | -0.15143 | 1.981            |
| H14  | -0.10022 | 0.38359  | -0.06063 | 1.854            |
| H15A | 0.75176  | 0.61693  | 0.27608  | 1.480            |
| H15B | 0.72960  | 0.55416  | 0.38863  | 1.480            |
| H19A | 0.58654  | 0.01418  | 0.04423  | 2.045            |
| H19B | 0.64343  | -0.04502 | 0.16108  | 2.045            |

|      |          |         |         |       |
|------|----------|---------|---------|-------|
| H19C | 0.74578  | 0.09033 | 0.12888 | 2.045 |
| H20A | 0.68536  | 0.84560 | 0.35238 | 1.753 |
| H20B | 0.65952  | 0.77407 | 0.46124 | 1.753 |
| H20C | 0.48614  | 0.86805 | 0.40229 | 1.753 |
| H25  | -0.01428 | 0.40768 | 0.12445 | 1.648 |

---
